# 1 **Comparative study of the unbinding process of some HTLV-1 protease** 2 **inhibitors using Unbiased Molecular Dynamics simulation**

3 Fereshteh Noroozi Tiyoula<sup>1</sup>, Hassan Aryapour\*<sup>1</sup>, Mostafa Javaheri Moghadam<sup>2</sup>

4 <sup>1</sup>Department of Biology, Faculty of Science, Golestan University, Gorgan, Iran

5 <sup>2</sup>Department of Chemistry, University of New Brunswick, 30 Dineen Drive, Fredericton,  
6 New Brunswick E3B 5A3, Canada

7 These authors contributed equally to this work.

8 \*Corresponding author. Department of Biology, Faculty of Science, Golestan University,  
9 Gorgan, Iran. Tel No: +98-17-32254161; Fax No. +98-17-32245964; E-mail address:  
10 [hassan.aryapour@gmail.com](mailto:hassan.aryapour@gmail.com)

11

## 12 **Abstract**

13 The HTLV-1 protease is one of the major antiviral targets to overwhelm this virus.  
14 Several research groups have been developing protease inhibitors over the years, but none  
15 has been successful. In this regard, the development of new HTLV-1 protease inhibitors  
16 based on fixing the defects of previous inhibitors will overcome the absence of curative  
17 treatment for this oncovirus. Thus, we decided to study the unbinding pathways of the most  
18 potent (compound 10,  $K_i = 15$  nM) and one of the weakest (compound 9,  $K_i = 7900$  nM)  
19 protease inhibitors, which are very structurally similar, with the PDB IDs: 4YDG, 4YDF,  
20 using the Supervised Molecular Dynamics (SuMD) method. In this project, we had various  
21 short and long-time-scale simulations, that in total, we could have 12 successful unbindings  
22 (a total of 14.8  $\mu$ s) for the two compounds in both mp forms. This comparative study  
23 measured all the essential factors simultaneously in two different inhibitors, which  
24 improved our results. This study revealed that Asp32 or Asp32' in the two forms of mp  
25 state similarly exert super power effects on maintaining both potent and weak inhibitors in  
26 the binding pocket of HTLV-1 protease . In parallel with the important impact of these two

27 residues, in the potent inhibitor's unbinding process, His66' was a great supporter, that was  
28 absent in the weak inhibitor's unbinding pathway. In contrast, in the weak inhibitor's  
29 unbinding process, Trp98/Trp98' by pi-pi stacking interactions were unfavorable for the  
30 stability of the inhibitor in the binding site. In our opinion, these results will assist in  
31 designing more potent and effective inhibitors for the HTLV-1 protease.

32 **Keywords:** HTLV-1; ATLL; HAM/TSP; Supervised Molecular Dynamics method  
33 (SuMD); Unbinding pathway

34

## 35 **Introduction**

36 Human T-cell leukemia virus type 1 (HTLV-1) was discovered in 1980 as the  
37 first oncogenic retrovirus in the project "War on Cancer" in the United States [1].  
38 According to the latest information, 5–10 million people are infected with this virus  
39 worldwide, and only 0.25–5% of them are affected by Adult T-cell Leukemia/Lymphoma  
40 (ATLL) and HTLV-1-associated myelopathy/tropical spastic paraparesis (HAM/TSP) [2].  
41 and also HTLV-1-associated ocular diseases. These diseases are known as HTLV-1 uveitis  
42 (HU) and ATL-related ocular [3]. Certainly, the reported numbers are not terrible, but there  
43 is no standard treatment for all types of diseases [4]. In addition, only a few regions were  
44 evaluated, and many unknown infected people could transmit the virus [5]. So, even low-  
45 risk areas are in danger because of Global Village. After HTLV-1 discovery, all its  
46 components were identified gradually, and its protease was discovered in 1989 [6]. HTLV-  
47 1 protease is a homodimer protein containing 125 residues in each subunit, which is one of  
48 the A2 family of aspartic proteases, with two key aspartates in the catalytic dyad. This  
49 enzyme is essential for viral growth because it cleaves the Gag-Pro-Pol-Env polyprotein, a  
50 necessary viral replication component [7]. Since this part is vital for the viral life cycle, it  
51 is an interesting target for HTLV-1 demise.

52 Toward this end, many research groups in different countries succeeded in  
53 designing and synthesizing various compounds with inhibitory effects in the micromolar

54 to nanomolar ranges [8, 9]. Finally, some German scientists considered the structural  
55 similarities between HTLV-1 and HTLV-3 (HIV) and determined the X-ray structure of  
56 Indinavir complexed with HTLV-1 protease, which is the only AIDS protease drug that  
57 has an inhibitory effect on HTLV-1 protease in low micromolar concentration.  
58 Unfortunately, this drug failed to be used to eradicate HTLV-1 [10]. After being frustrated  
59 with AIDS drugs, this team, in 2015, succeeded in synthesizing ten inhibitors that contain  
60 the most potent nonpeptidic inhibitor of HTLV-1 protease up to now [11].

61 All reported HTLV-1 protease compounds only remain as inhibitors, and we do not  
62 have any specialized FDA-approved drug for this virus. It is evident that experimental  
63 researches alone are not sufficient, and *in silico* methods, like unbiased molecular  
64 dynamics (UMD), are needed to provide valuable information for rational drug design,  
65 which is the primary goal of all researchers in this field. MD simulation offers information  
66 about the reaction pathways of the ligand-protein complexes, and it has been considered  
67 by many research groups over these years and led to effective drug design [12, 13].  
68 Therefore, besides the importance of one particular drug's binding affinity to a target  
69 protein in traditional drug design, the binding and unbinding processes and the residence  
70 time the compound interacts with the protein in each intermediate state are just as  
71 important. So by a complete understanding of the unbinding mechanism, we can uncover  
72 the key elements in the protein-ligand complex interactions, ligand flexibility, and  
73 solvation effects that are more critical in the rational drug design. The obtained vital  
74 information will ultimately appear in a scenario with fully atomistic details [14]. For  
75 investigating unbinding pathways of inhibitors, some advanced MD simulation approaches  
76 like metadynamics and supervised metadynamics (suMetaD) simulation have been used  
77 before [15, 16], and one of the newest MD approaches is the supervised molecular  
78 dynamics (SuMD) method. This unbiased method performs simulation in replicas with  
79 fixed parameters and prepares information regarding metastable intermediate ligand-bound  
80 states. In this regard, the SuMD has been utilized to discover the reaction pathways of  
81 various ligands in molecular targets [17]. Therefore, we decided to examine the unbinding

82 pathways of the most potent and one of the weakest HTLV-1 protease inhibitors retrieved  
83 from the last designed compounds using SuMD.

84

## 85 **Methods**

86 The X-ray crystallography structures of HTLV-1 protease-ligand complex (PDB  
87 IDs: 4YDG, 4YDF [11]) were obtained from the Protein Data Bank. At first, for protein  
88 preparation, all protein missing residues and atoms in 4YDG were remodeled and fixed  
89 using UCSF Chimera software [18]. Then, for the ligand preparation, according to the  
90 practical information [11], the nitrogen of the pyrrolidine ring was protonated in both  
91 compounds and parameterized by ACEPYPE using default settings (the GAFF atom type  
92 and BCC partial charges) [19]. After preparation of complexes, based on the  
93 monoprotinated (mp) form of the catalytic dyad Asp32-Asp32' in the active site [20], each  
94 catalytic Asp was considered separately as an ionization state. Finally, we constructed our  
95 systems in GROMACS 2018 [21] using the OPLS all-atom force field [22] and with the  
96 TIP3P water model [23]. The considered holoproteins were located in the center of the  
97 triclinic box with a distance of 1 nm from each edge. The next step was to provide a 150  
98 mM neutral physiological salt concentration, sodium, and chloride ions. Then all systems  
99 were relaxed in energy minimization using the steepest descent algorithm and reached  
100 Fmax of less than  $1000 \text{ kJ.mol}^{-1}.\text{nm}^{-1}$ . All covalent bonds by Linear Constraint Solver  
101 (LINCS) algorithm were constrained to maintain constant bond lengths [24]. The long-  
102 range electrostatic interactions were treated using the Particle Mesh Ewald (PME) method  
103 [25], and the cut-off radii for Coulomb and Van der Waals (VdW) short-range interactions  
104 were set to 0.9 nm for all systems.

105 At last, the modified Berendsen (V-rescale) thermostat [26] and Parrinello-Rahman  
106 barostat [27] were applied for 100 and 300 ps, for the equilibrations and keep the system  
107 in stable environmental conditions (310 K, 1 Bar) and got ready to begin molecular  
108 dynamic simulations with a time step of 2 fs and without applying any human or non-

109 human biasing force or potential. In this regard, to reach complete unbinds, we performed  
110 12 separate series of replicas (three replicas for each type of mp form) with fixed duration  
111 times, by the SuMD method with some modifications [28]. During the simulation, the  
112 distance of the center of masses of the ligand and selected residues in the binding site was  
113 monitored in a fixed time window until full unbind occurs. This method is based on tabu-  
114 like supervision algorithm without applying any biasing force or potential. Herein, we set  
115 the center of mass (COM) of ligands as a first spot and the COM of the catalytic aspartic  
116 acids (Asp32, Asp32') as second spots and ran all simulations with a time window of 500  
117 ps. After finishing each run, the frame with the longest distance between selected spots was  
118 selected automatically to extend the next 500 ps simulation. These processes were  
119 continued until complete unbind was obtained, which is equal to a distance of 50 Å between  
120 the mentioned spots. Finally, all events in every concatenated trajectory file were  
121 investigated carefully with GROMACS utilities for data analysis. To picture the important  
122 interactions, we used UCSF chimera and used Daniel's XL Toolbox (v7.3.4) to create plots  
123 [29], and using Matplotlib to show free energy landscapes [30]. The free energy landscapes  
124 plots were made based on three variables: time, ligand RMSD, and protein RMSD. The  
125 ligand and protein RMSD values were selected because they were meaningful and had  
126 sharp changes as a function of time during unbindings. Analyzing these plots can reveal  
127 the stable states of inhibitors, as well as the residence time of inhibitors in each state over  
128 unbinding. Areas that tend to turn blue color indicate that the inhibitor has been present in  
129 this area for a longer time.

130

## 131 **Results and Discussion**

132 Since the only structural difference between compounds 9 and 10 is in the amino  
133 and nitro groups on the benzene ring (Figure 1a, 1b), compound 10 ( $K_i = 15$  nM) is  
134 approximately 526 times more potent in complex with HTLV-1 protease [11]. Therefore,  
135 a proper understanding of the unbinding pathways of these compounds is vital to unveiling  
136 secrets that a minor structural difference can have a dramatic effect on inhibitory effects.

137

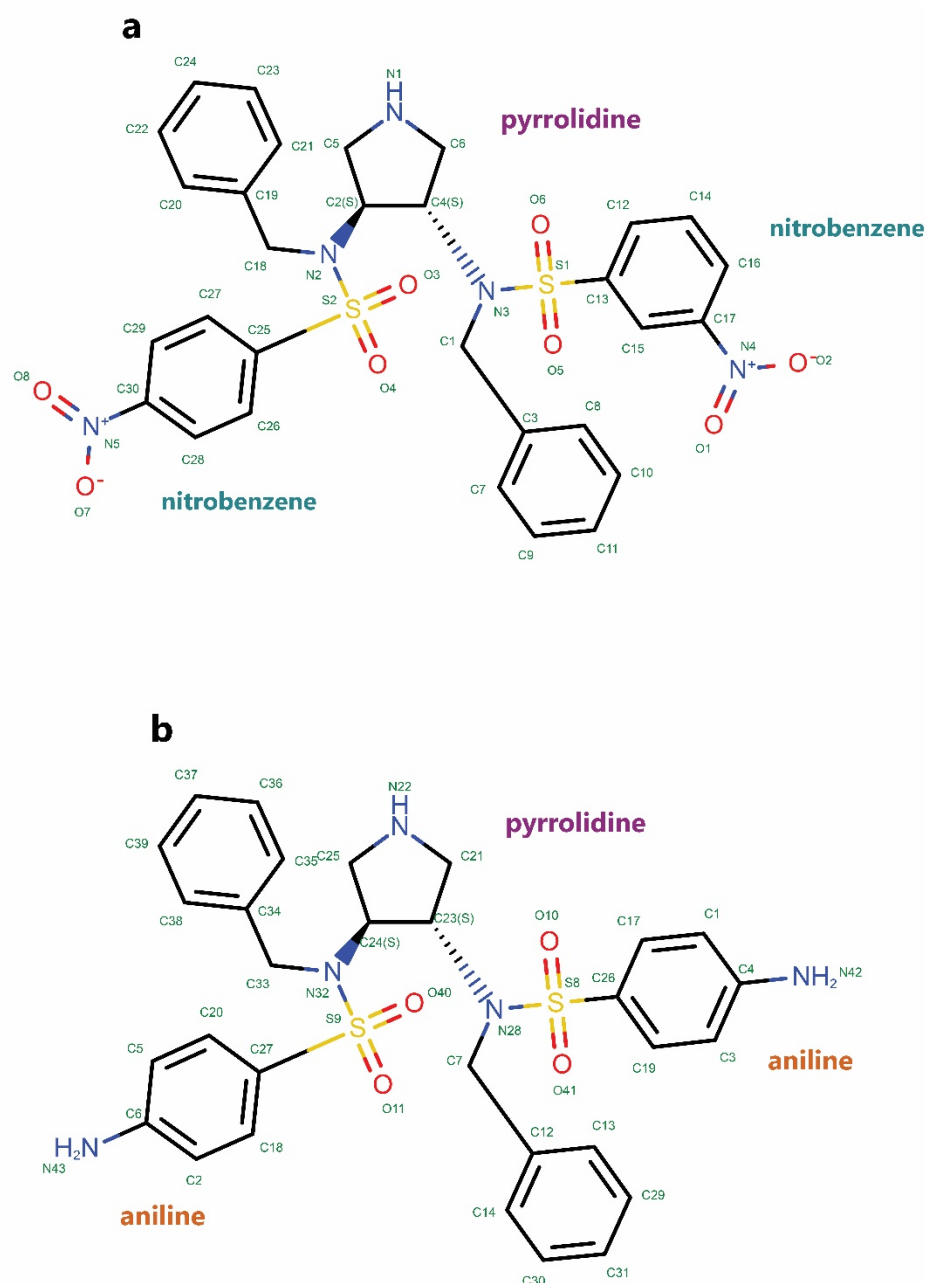

138

139 **Figure 1.** The 2D structures of selected compounds were obtained from PDB. **a**, Compound 9, the inhibitor  
140 in (PDB ID 4YDF). **b**, Compound 10, the inhibitor in (PDB ID 4YDG).

141

142 For a complete understanding of unbinding mechanisms of these two compounds,  
143 it is better to get more familiar with this less-known virus's protease structure and inhibitors

144 features at first. This homodimer protein has some particular regions with strategic effects  
145 in keeping ligands in the protein's binding pocket that are obtained from analysis of  
146 trajectories. The active site region (Leu31-Val39 and Leu31'-Val39') contains catalytic  
147 dyad aspartate residues (Asp32, Asp32') that are so important in protein-inhibitor  
148 interactions. The second essential region is the flaps (Val56-Thr63 and Val56'-Thr63').  
149 The specific residues of Ala59-59' consider as flap tips in the region of the flaps. Finally,  
150 Lateral Loops or 95S loops part of protease (Lys95-Gly102 and Lys95'-Gly102') are other  
151 key regions in this aspartic protease (Figure 2a). For the inhibitors, both compounds have  
152 pi-pi self-interactions. With more details, in compound 9, the nitrobenzene ring can form  
153 face-to-face pi-pi interaction with the benzene ring (Figure 2b), and in compound 10,  
154 aniline ring can form T-shaped edge-to-face pi-pi interaction with the benzene ring (Figure  
155 2c).

156

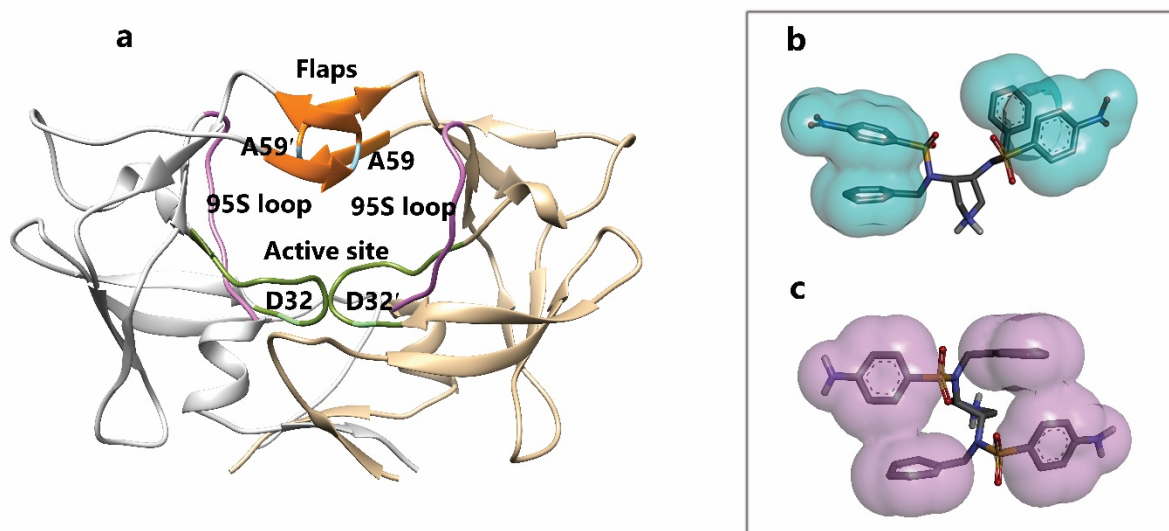

157

158 **Figure 2.** The 3D structure of HTLV-1 protease (PDB ID 4YDF) and self-interactions of inhibitors. **a**, All  
159 important domains of HTLV-1 protease: the green area is the active site region, the purple area is Lateral  
160 Loops or 95S loops part of protease, the orange area is the flaps region, and the blue area is the flap tips  
161 part. **b**, Compound 9. **c**, Compound 10.

162

163 As mentioned, one of the essential parts of this protein is the flaps region, which showed  
164 high flexibility during our simulations (Figure 3e, 3f, 3g & 3h). So, during our simulations,  
165 four modes were observed for the flaps. Herein, we considered two factors to show these  
166 modes: the distance between COMs of Ala59 and Ala59' (d1), and the second one is the  
167 distance between COMs of Ala59' and Asp32' (d2). The second factor can be even between  
168 COMs of Ala59 and Asp 32 due to flaps' handedness opening. In the close form, the  
169 maximum amount of d1 and d2 are 10 and 15 Å, respectively (Figure 3a). In the semi-open  
170 form, the maximum amount of d1 and d2 is 14 and 20 Å, respectively (Figure 3b). In the  
171 open state, the minimum amount of d1 is 14 Å, and the maximum amounts of d1 and d2  
172 are 20 Å (Figure 3c). In the wide-open form, d1 and d2 must be more than 20 Å (Figure  
173 3d).



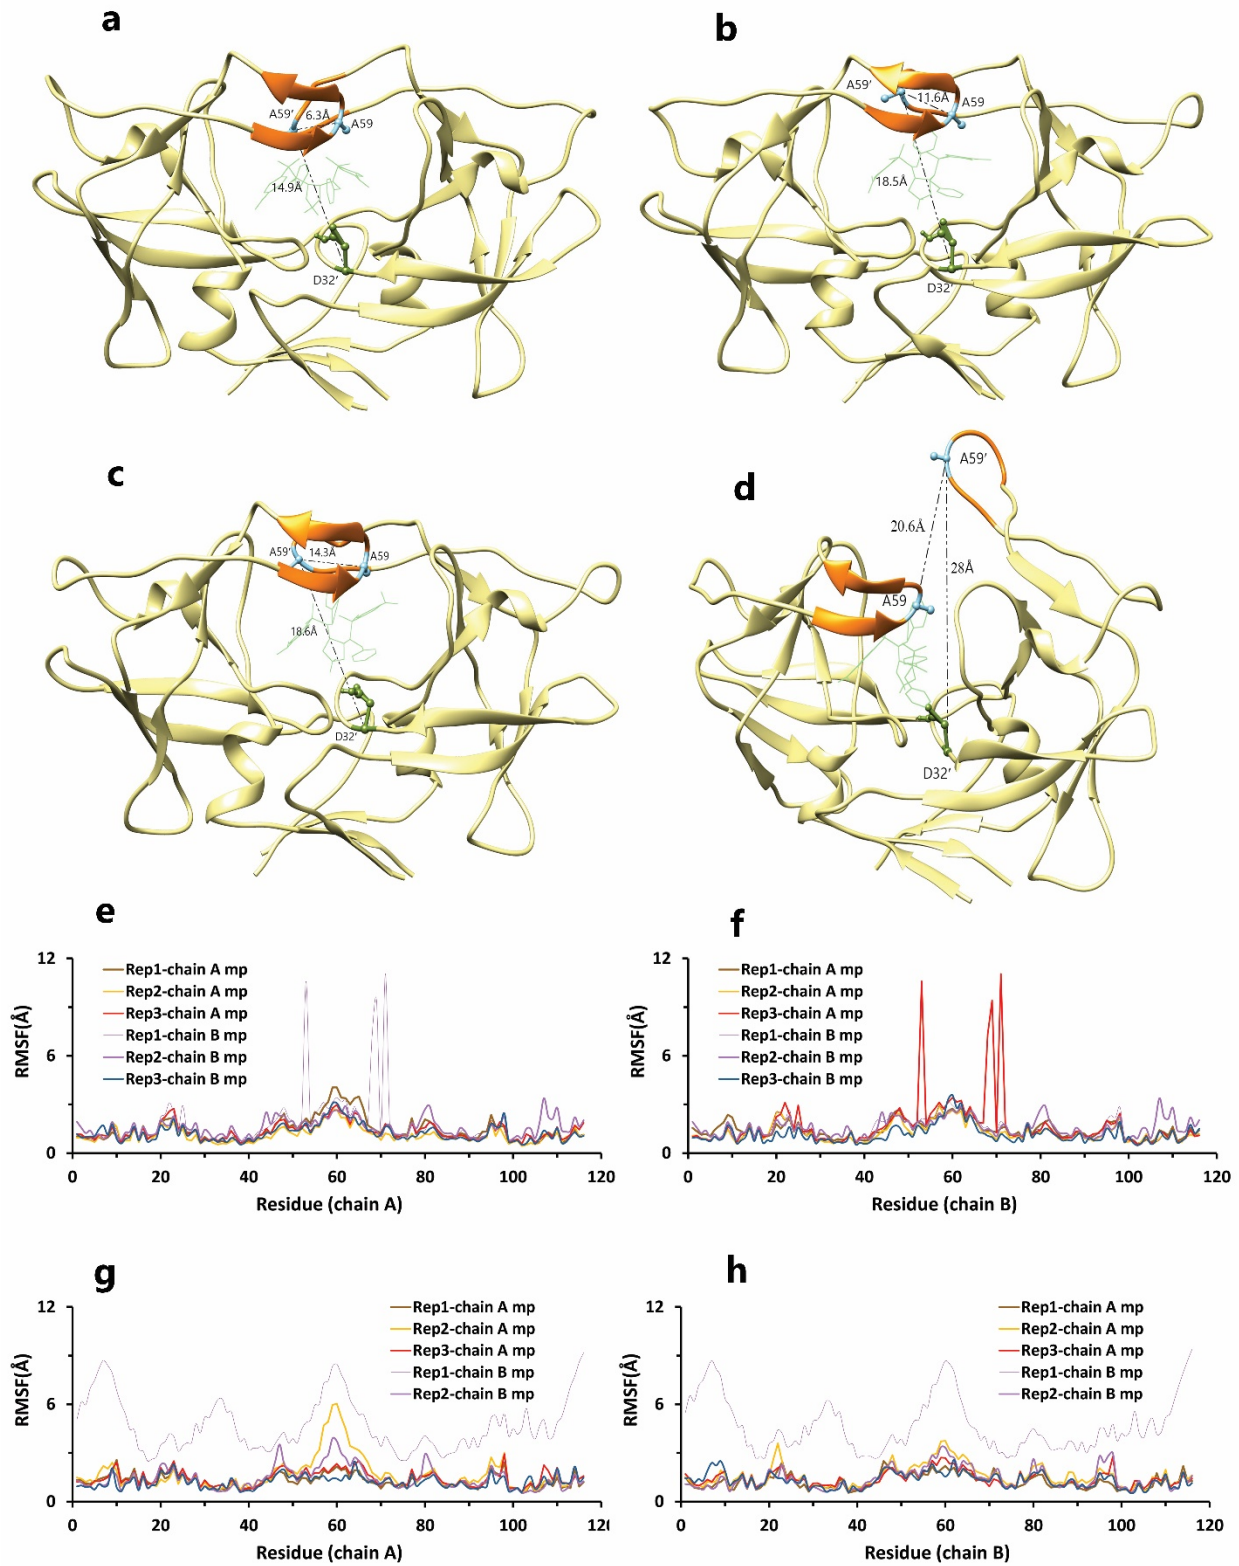

175 **Figure 3.** Different modes of the flap. **a**, Close form of the flap. **b**, Semi-open form of the flap. **c**, Open  
176 form of the flap. **d**, Wide-open form of the flap. **e, f**, RMSF values of HTLV-1 protease in the 4YDG PDB  
177 code, during our simulations. **g, h**, RMSF values of HTLV-1 protease in the 4YDF PDB code, during our  
178 simulations.

179

180 For our purpose, we had various short and long-time-scale simulations, that in total,  
181 we could have 12 successful unbindings (a total of 14.800  $\mu$ s) for the two compounds from  
182 a minimum of 94 ns to a maximum of 4.4  $\mu$ s in both mp forms. At last, for providing  
183 comprehensive information, all the events in each frame of trajectories were investigated  
184 carefully, and different analyses were performed on them.

185 We had two mp forms of the potent compound (AspH32 and AspH32') like the  
186 weak compound. In this regard, in the duration times of 4.4 $\mu$ s (Figure 4a) and 260 and 305  
187 ns (Figure 4b), which were in the chain A, Asp32 protonated state, we saw a uniform  
188 mechanism to unbind with some important differences that caused a significant difference  
189 in one of simulation time. So, in the first state of rep1, 2, and 3 (Figure 4c, 4d, 4e), Asp32',  
190 which had salt bridge interaction with the positive charge of the pyrrolidine ring, play a  
191 crucial role in preserving ligand in the binding pocket of protease. This acidic residue is  
192 essential because it is located almost at the bottom and center of the binding pocket. This  
193 residue considers as a strategic residue due to the positive charge of pyrrolidine. Parallel to  
194 that, His66' by cation-pi interaction with an aniline ring was the second important  
195 preserving factor. In addition, Ala59' in the flap tip by forming H-bond with the atom of  
196 O<sub>10</sub> (Figure 4h) and also Ala35' by VdW interactions with a benzene ring, Asp36' by  
197 forming H-bond with an aniline fragment in the active site and finally Ile100' in 95S loop  
198 (Figure 4j, 4k, 4l), with VdW interaction, blocked all the exit routes, like the fence (Figure  
199 4f). As mentioned before, His66' was the second important residue in this state, which was  
200 a supporter of Asp32' to fix the inhibitor in the binding pocket. As time passing, Asp32'  
201 loosed its superpower of preserving, and the inhibitor entered the second intermediate state.  
202 In this state, Lys95' by forming a hydrogen bond with the atom of O<sub>10</sub>, along with His66'

203 cation- $\pi$  interaction with the benzene ring, was a third essential residue. This residue  
204 increased protein-ligand interactions time in the rep1 and was absent in rep2 and rep3  
205 (Figure 4g). According to significant differences in replicas simulation times, the effects  
206 of the Lys95' hydrogen bond (Figure 4i) appear more pronounced. Finally, ligand  $\pi$ - $\pi$   
207 self-interactions, which were observed in the whole time of simulations (Figure 5a, 5b, 5c),  
208 weakened all important protein-inhibitor interactions slowly. The critical point was that,  
209 over the entire simulation time, flaps positioning impacted ligand's behaviors, so the exit  
210 process started when the flaps began to open, and Ala59' loosed its effect (Figure 5d, 5e,  
211 5f) in the second intermediate state gradually with the help of water mediation (Figure 6a,  
212 6b, 6c).

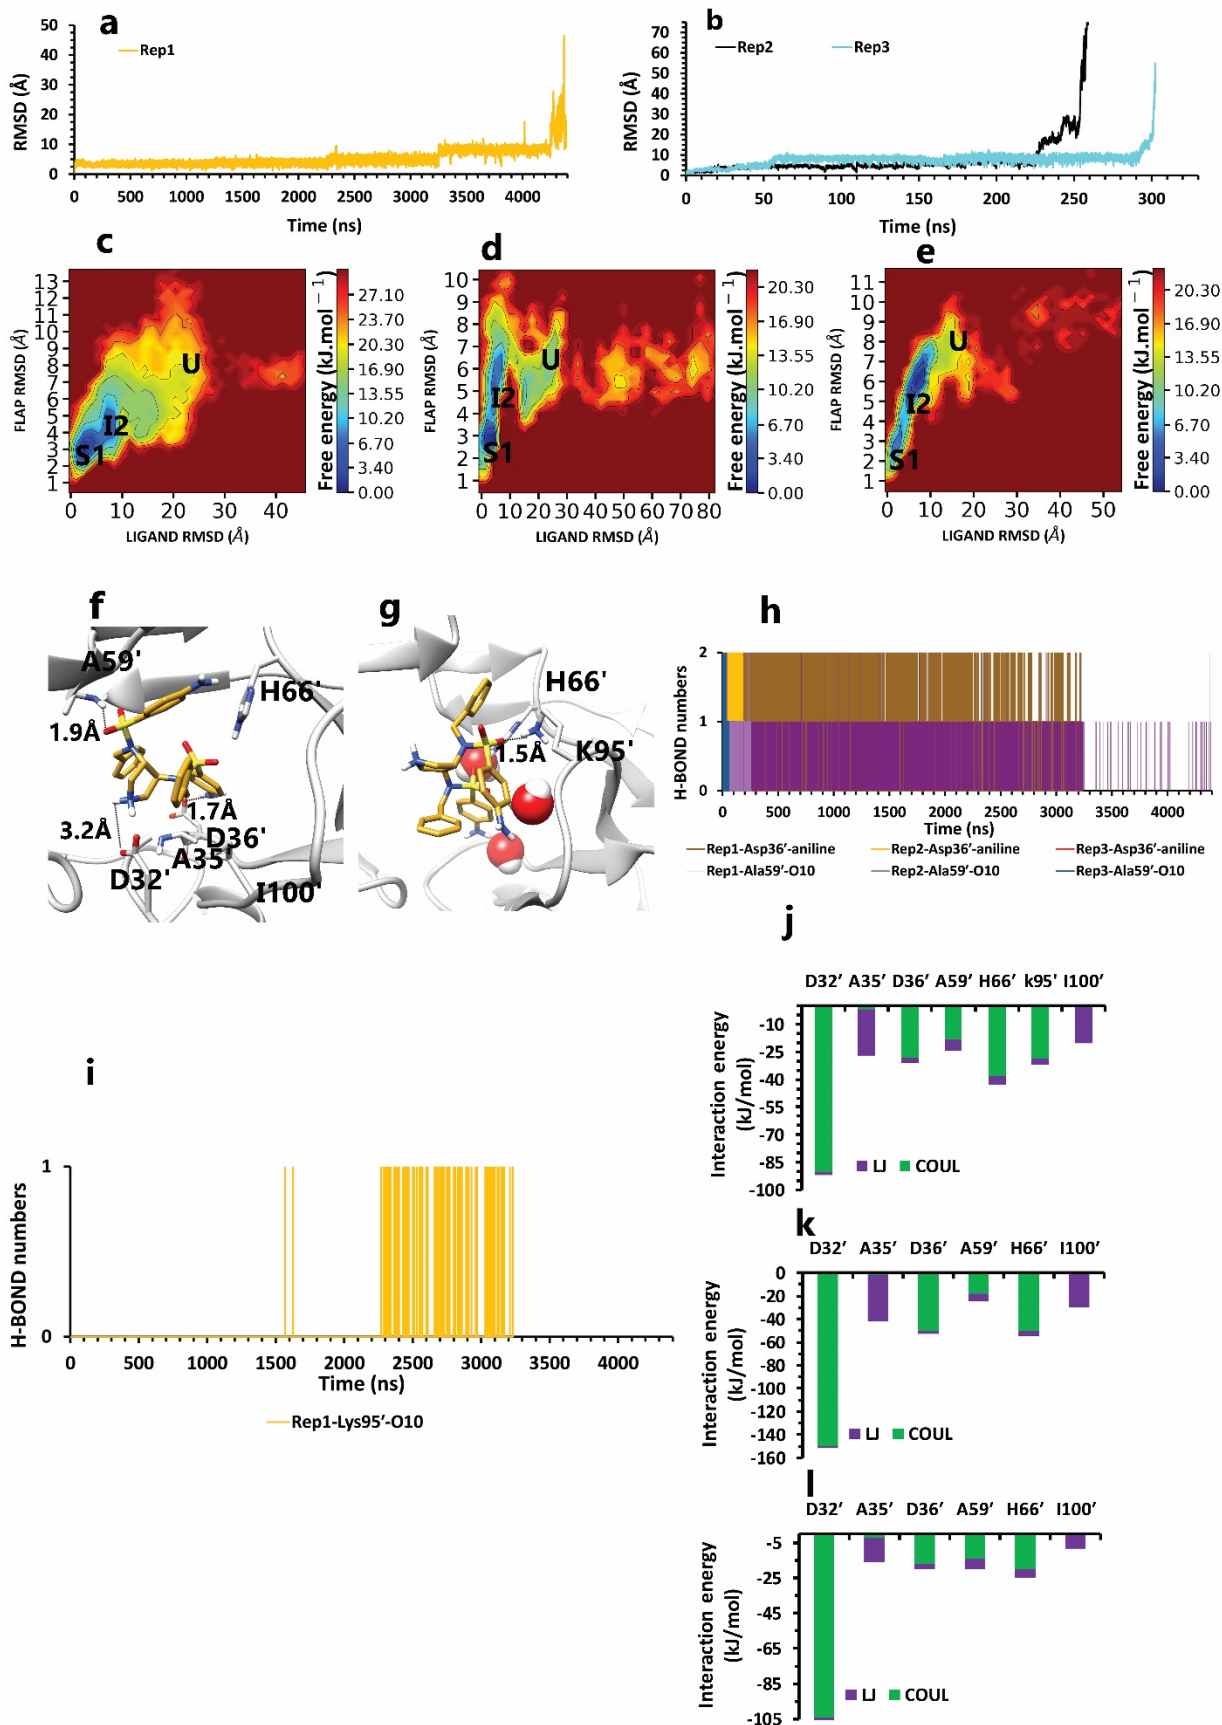

214 **Figure 4.** The details of compound 10 unbinding pathways in complex with HTLV-1 protease when Asp32  
215 of chain A was protonated in three replicas. **a**, RMSD value of the ligand from binding pose to complete  
216 unbinding in the rep1. **b**, RMSD values of the ligand from binding pose to complete unbinding in the rep2  
217 and rep3. **c**, **d**, and **e**, The free energy landscape of rep1, 2, and 3 during the unbinding process ( state (S),  
218 intermediate state (I), unbound (U) ), respectively, which was calculated by using "gmx sham". **f**, The  
219 interactions between the ligand and important residues in the binding pose of rep1, 2, and 3. **g**, The new  
220 interactions between the inhibitor and particular residues in the second intermediate state of rep1. **h**,  
221 Hydrogen bond numbers of Asp36' and Ala59' with the inhibitor in rep1, 2, and 3 **i**, Hydrogen bond numbers  
222 of Lys95' with the inhibitor in rep1. **j**, **k**, and **l**, The average of most important interaction energies of the  
223 protein-ligand complex in rep1, 2, and 3, respectively.

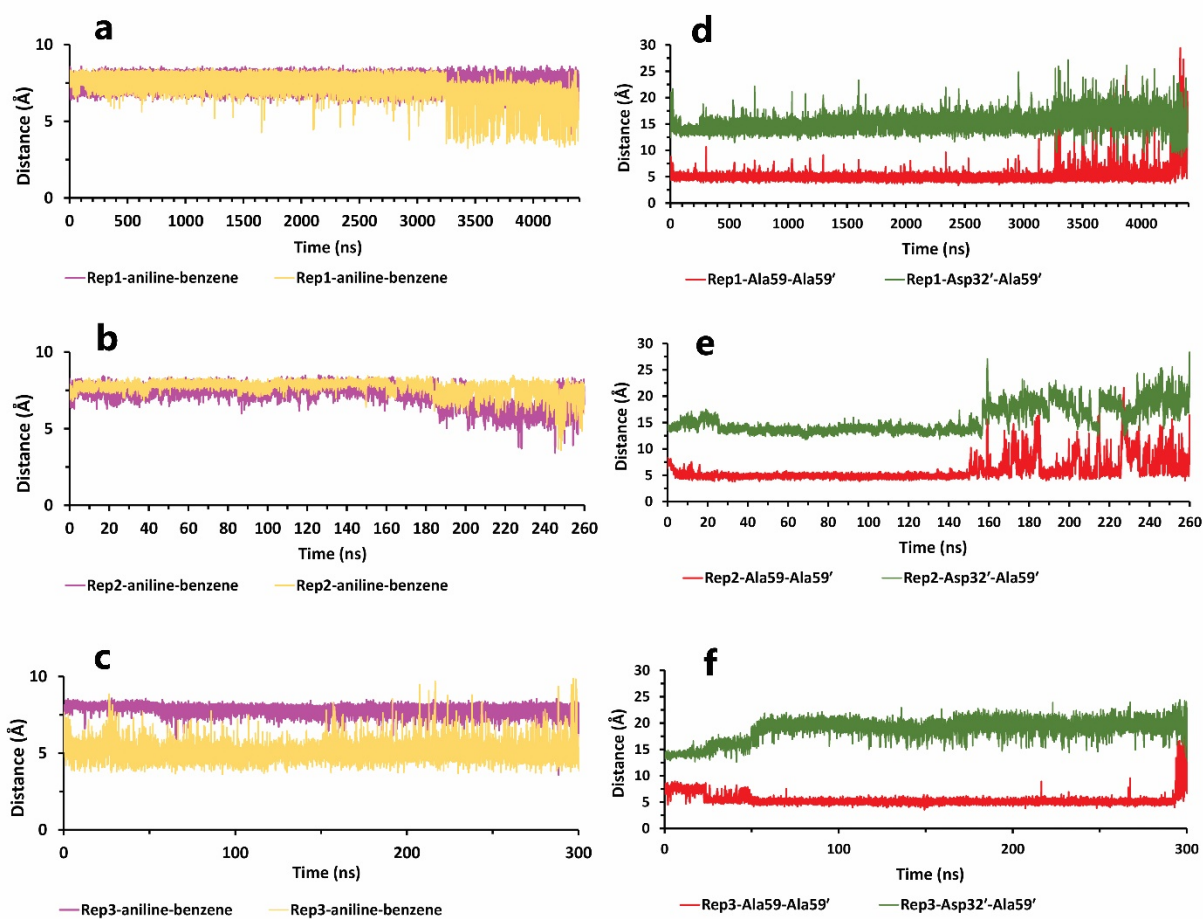

224  
225 **Figure 5.** The details of distances between particular parts in compound 10 in complex with HTLV-1  
226 protease, when Asp32 of chain A was protonated in three replicas. **a**, **b**, and **c**, The distance between COMs  
227 of both aniline rings and benzene rings, which were in a position that could form pi-pi self-interactions in

228 all replicas. These plots prove that during the whole simulation, these fragments were so close together. **d**,  
229 **e** and **f**, The distance between COMs of Ala59 and Ala59', and also Asp32' and Ala59' in all replicas (these  
230 plots should be checked along with Figure 3).

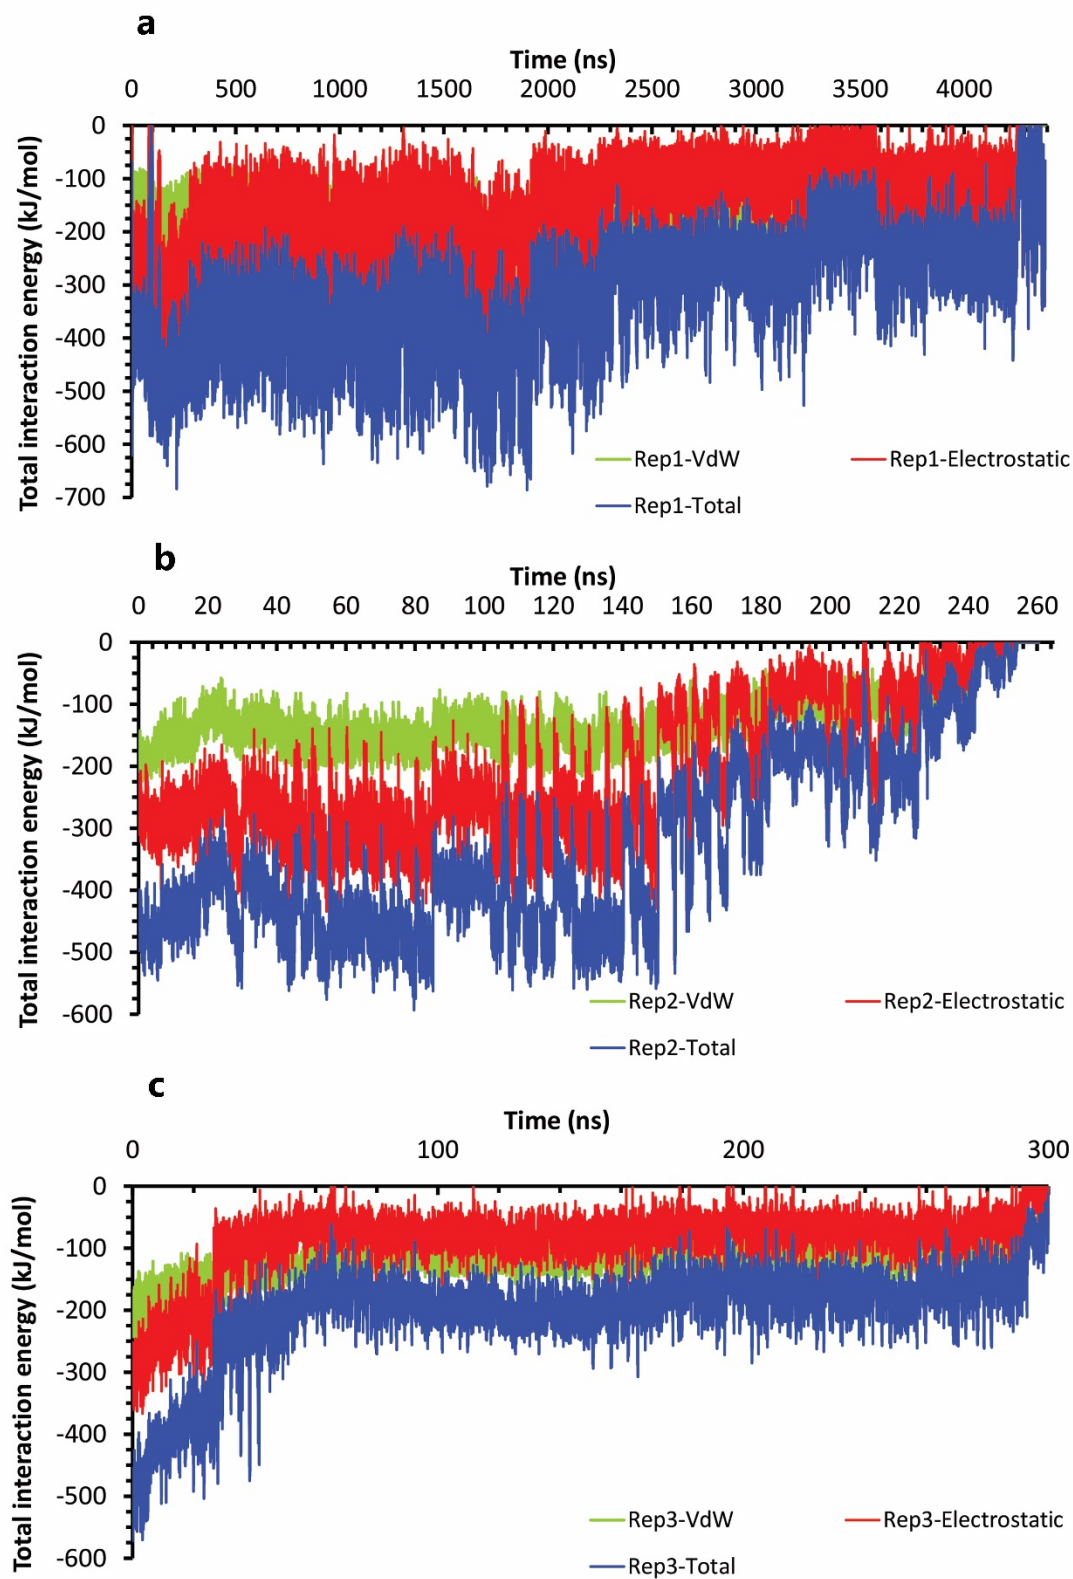

232 **Figure 6.** The interaction energies plots of compound 10 in complex with HTLV-1 protease when Asp32  
233 of chain A was protonated in three replicas. **a, b,** and **c,** The total VdW, and electrostatic interactions  
234 energies of protein-inhibitor complexes in rep1, 2, and 3.

235         Conversely, in the other state of protonation (AspH32'), we saw a uniform pathway  
236 that was dissimilar to the previous model with the different lengths of times involving: 94,  
237 320, and 790 ns (Figure 7a, 7b). In the first state (S1) of these pathways (Figure 7c, 7d, 7e),  
238 Asp32 was so important as expected. Asp36 and Asp36', Leu57, and Ala59' are the residues  
239 that acted as auxiliary agents (Figure 7j, 7k, 7l) to the pivotal amino acid (Asp32). Details,  
240 at first times of simulation along with the salt bridge of Asp32 and pyrrolidine fragment  
241 (Figure 7f), both aniline rings had H-bonds with Asp36 and Asp36' in the active site (Figure  
242 7h). Along with these residues, Leu57 and Ala59' formed a hydrogen bond with an aniline  
243 fragment and O<sub>41</sub> atom of inhibitor, respectively (Figure 7g, 7i). In the following, in the  
244 lack of His66 and Lys95 effects, after time passing with the help of pi-pi ligand self-  
245 interactions and water molecules effect (Figure 8a, 8b, 8c), active site and flaps' important  
246 residues lost their effects, and full unbind was observed between the flaps (Figure 8d, 8e,  
247 8f) (Figure 9a, 9b, 9c).

248



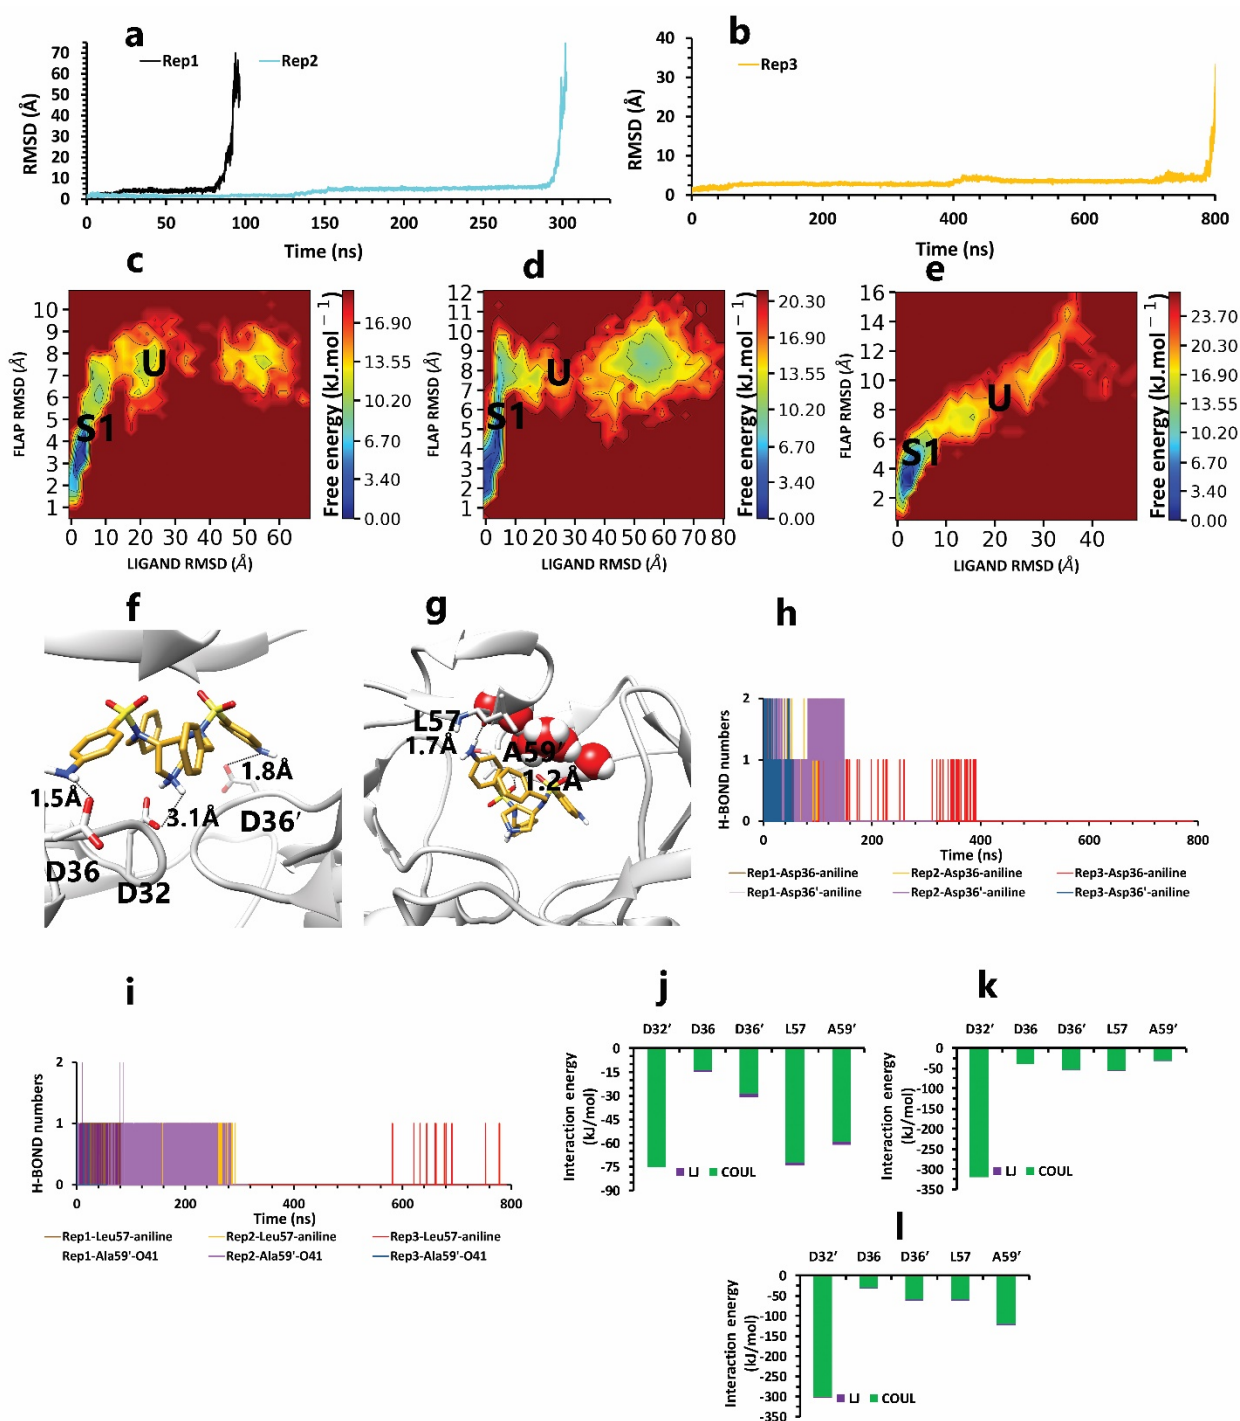

249

250 **Figure 7.** The details of compound 10 unbinding pathways in complex with HTLV-1 protease when Asp32'  
 251 of chain B was protonated in three replicas. **a**, RMSD values of the ligand from binding pose to complete  
 252 unbinding in the rep1 and rep2. **b**, RMSD value of the ligand from binding pose to complete unbinding in  
 253 the rep3. **c**, **d**, and **e**, The free energy landscape of rep1, 2, and 3 during the unbinding process ( state (S),  
 254 intermediate state (I), unbound (U) ) respectively, which was calculated by using "gmx sham". **f**, The

255 interactions between the ligand and important residues of the active site in the binding pose of rep1, 2, and  
256 3 **g**, The interactions between the ligand and important residues of flaps region in the binding pose of rep1,  
257 2, and 3. **h**, Hydrogen bond numbers of Asp36 and Asp36' with aniline fragment in rep1, 2, and 3. **i**,  
258 Hydrogen bond numbers of Leu57 and Ala59' with the inhibitor in rep1, 2, and 3. **j**, **k** and **l**, The average  
259 of most important interaction energies of the protein-ligand complex in rep1, 2, and 3, respectively.

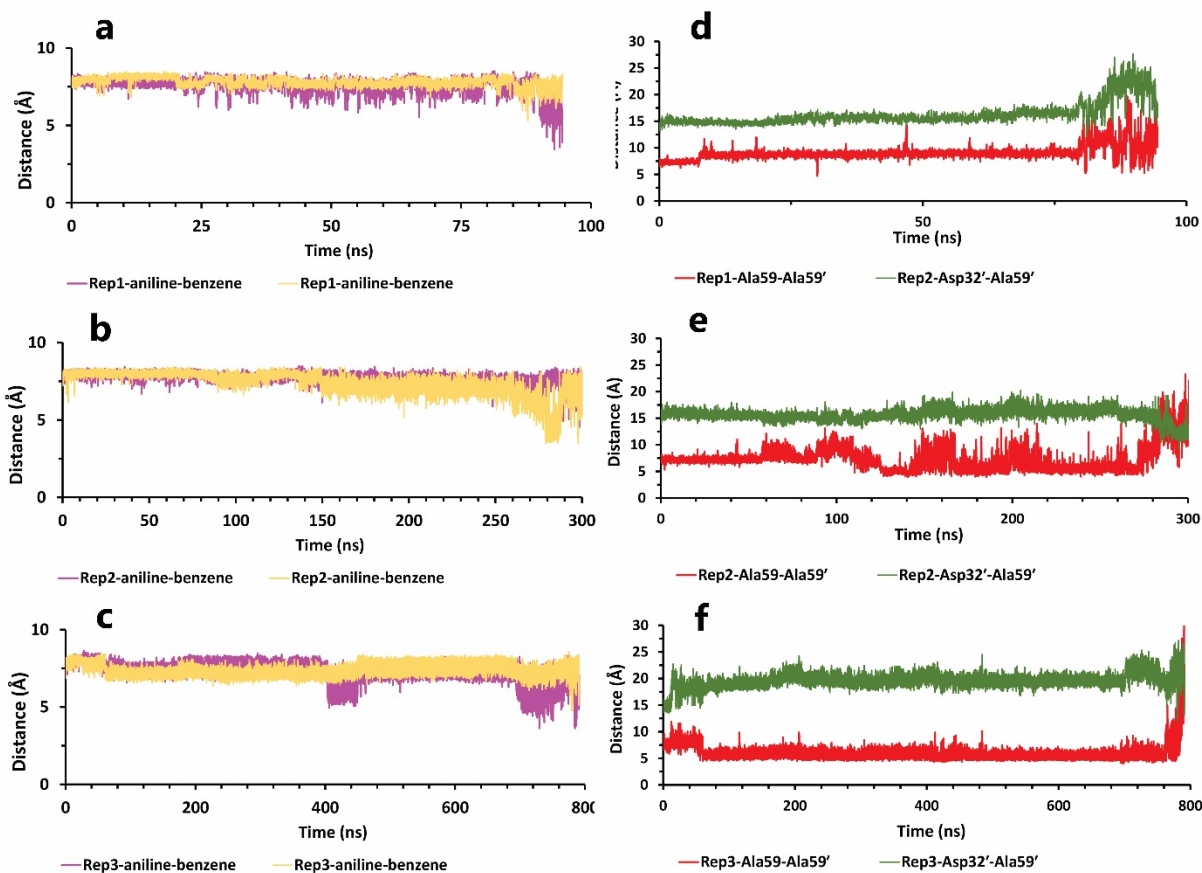

260  
261 **Figure 8.** The details of distances between particular parts in compound 10 in complex with HTLV-1  
262 protease, when Asp32 of chain B was protonated, in three replicas. **a**, **b**, and **c**, The distance between COMs  
263 of both aniline rings and benzene rings, which were in a position that could form pi-pi self-interactions in  
264 all replicas. These plots prove that during the whole simulation, these fragments were so close together. **d**,  
265 **e**, and **f**, The distance between COMs of Ala59 and Ala59' and also Asp32' Ala59' in all replicas (these plots  
266 should be checked with Figure 3).

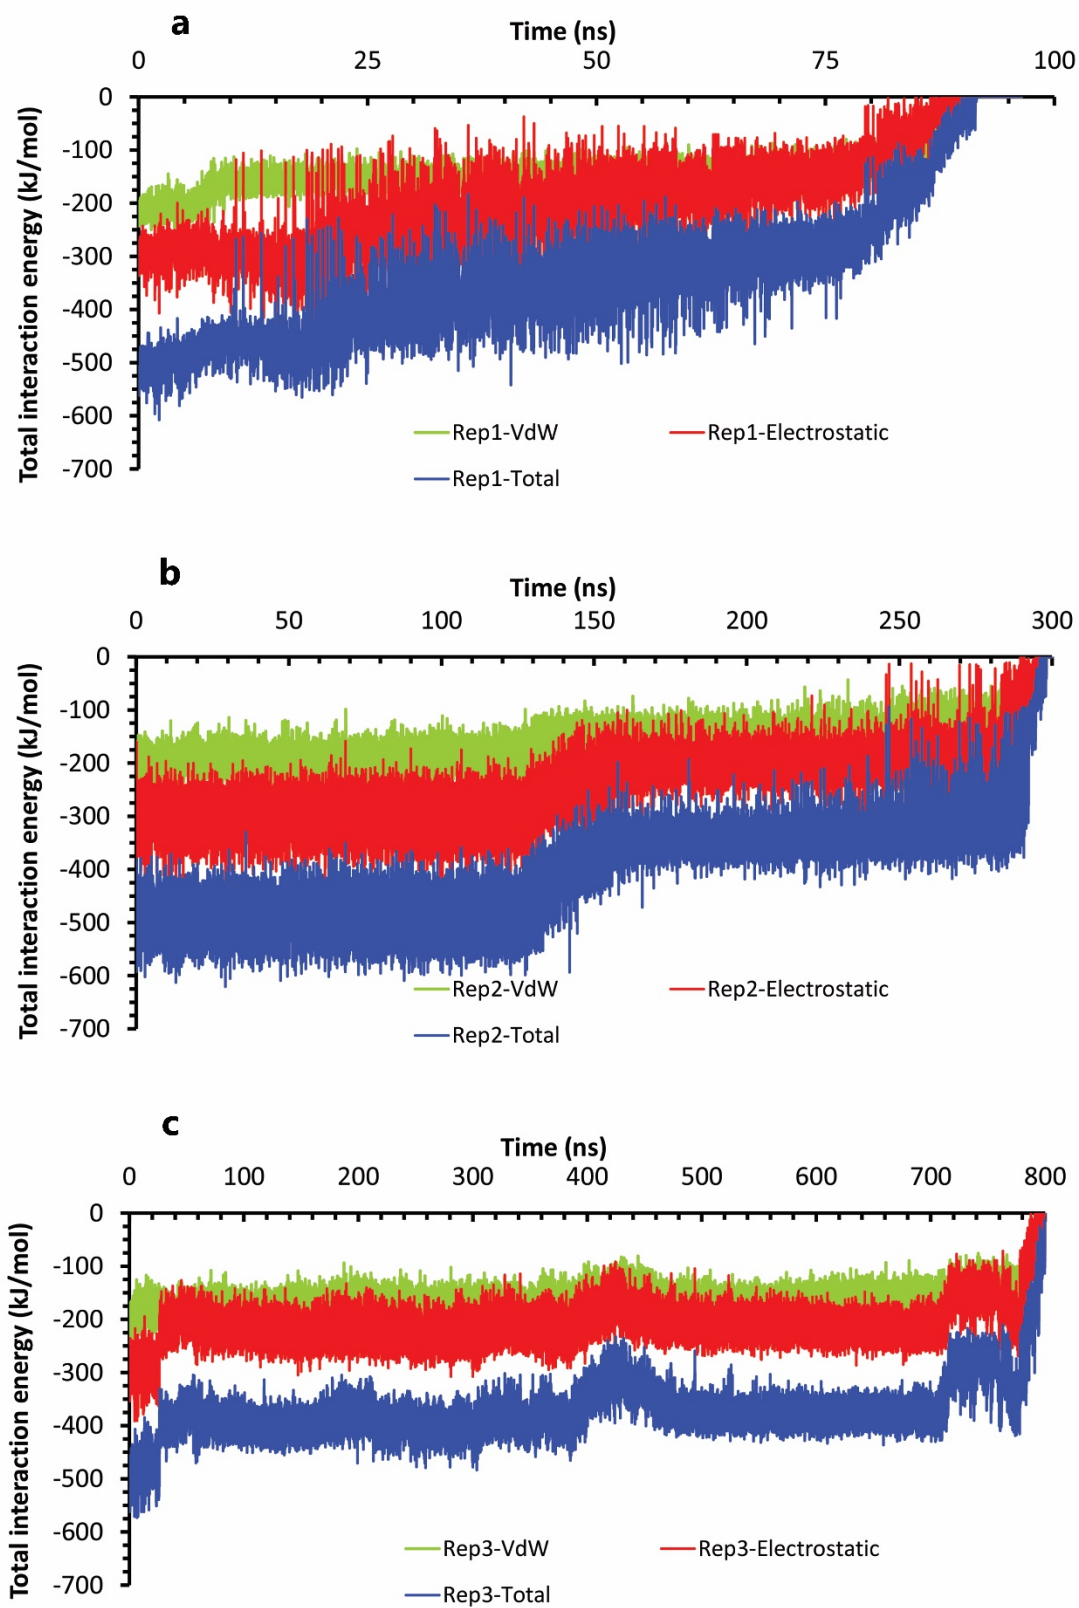

268 **Figure 9.** The interaction energies plots of compound 10 in complex with HTLV-1 protease when Asp32  
269 of chain B was protonated in three replicas. **a, b,** and **c,** The total VdW and electrostatic interactions energies  
270 of protein-inhibitor complexes in rep1, 2, and 3

271

272 We had different unbinding mechanisms for the weaker inhibitor, depending on  
273 close and open flaps and mp states. Accordingly, compound 9 was unbound in the duration  
274 times of 148 ns (Figure 10a), 3.5  $\mu$ s and 3  $\mu$ s (Figure 10b) when Asp 32 of chain A was  
275 protonated. In the first state (S1) (Figure 10c) of the rapid unbinding pathway (rep1), a  
276 repulsive force occurred between the pyrrolidine ring of ligand and AspH32 of the binding  
277 pocket, and because of no attractive interactions in this area, AspH32 forced the ligand to  
278 push out. In addition to this interaction, VdW interaction between both nitrobenzene rings  
279 and one of the benzene ring of inhibitor and Leu57, Gly58 and Ala59 in the close flap  
280 region and pi-pi stacking interaction of Trp98' and nitrobenzene fragment and also pi-alkyl  
281 interaction of Ile100' with the benzene ring, were other protein-inhibitor important  
282 interactions, which were not potent enough to prevent from repulsive interaction effect  
283 (Figure 10f, 10k). In the two other long-time simulations, compound 9 was unbound in 3.5  
284  $\mu$ s in wide-open form of flaps (rep2) and 3  $\mu$ s in close and semi-open forms of flaps (rep3).

285 Similarly, Asp32' was the most important amino acid with its salt bridge and the  
286 only common point in both pathways. In the first state of rep2 (S1) (Figure 10d), due to  
287 handedness opening, only one of the flaps had forward and backward motions, so Leu57',  
288 Gly58', Ala59' by VdW interactions, kept the ligand in exposing to Asp32'. Also, in this  
289 state, Trp98 in the lateral loop built up pi-pi stacking interaction with nitrobenzene ring of  
290 the ligand and Trp98' built up pi-pi stacking interaction with benzene ring of another side  
291 of inhibitor (Figure 10g, 10l). So even with enough space for the exit, the inhibitor was still  
292 in blockage. These important protein-inhibitor interactions were maintained until the effect  
293 of the Asp32' became faded, and other agents, one after another, lost their effect.  
294 Unexpectedly, the interesting point was that the complete unbinding process does not occur  
295 from the region of the flaps. In the rep3 pathway, that the flaps were close or semi-open

296 the whole time, from the first state (Figure 10e), not only Asp32' was important, and Asp36  
297 in a close position to Asp32' was powerful too (Figure 10m).

298 On the other hand, during the first two states, Asp36 by forming pi-anion interaction  
299 with nitrobenzene fragment, was momentous as a second ligand preserving residue (Figure  
300 10h), which was promoted to the first important factor in the next intermediate state by  
301 replacing pi-anion interaction with the salt bridge with pyrrolidine fragment (Figure 10i).  
302 From a holistic view, even though Asp32' was more critical for protein, it was effective  
303 until the second intermediate state or until 2  $\mu$ s, but Asp36 (Figure 10j) was effective until  
304 complete unbind. Actually, the ligand in all replicas showed face-to-face pi-pi self-  
305 interactions between mentioned fragments that caused weakened important protein-ligand  
306 interactions gradually with the help of water mediation effect (Figure 11a, 11b, 11c).  
307 Finally, for the flaps behaviors in all replicas, we saw a new opening form for the rep2 as  
308 it was opened from chain A (Figure 11e), and for rep1 and rep3 wide opening (Figure 11d,  
309 11f) was not seen until complete unbound (Figure 12a, 12b, 12c).

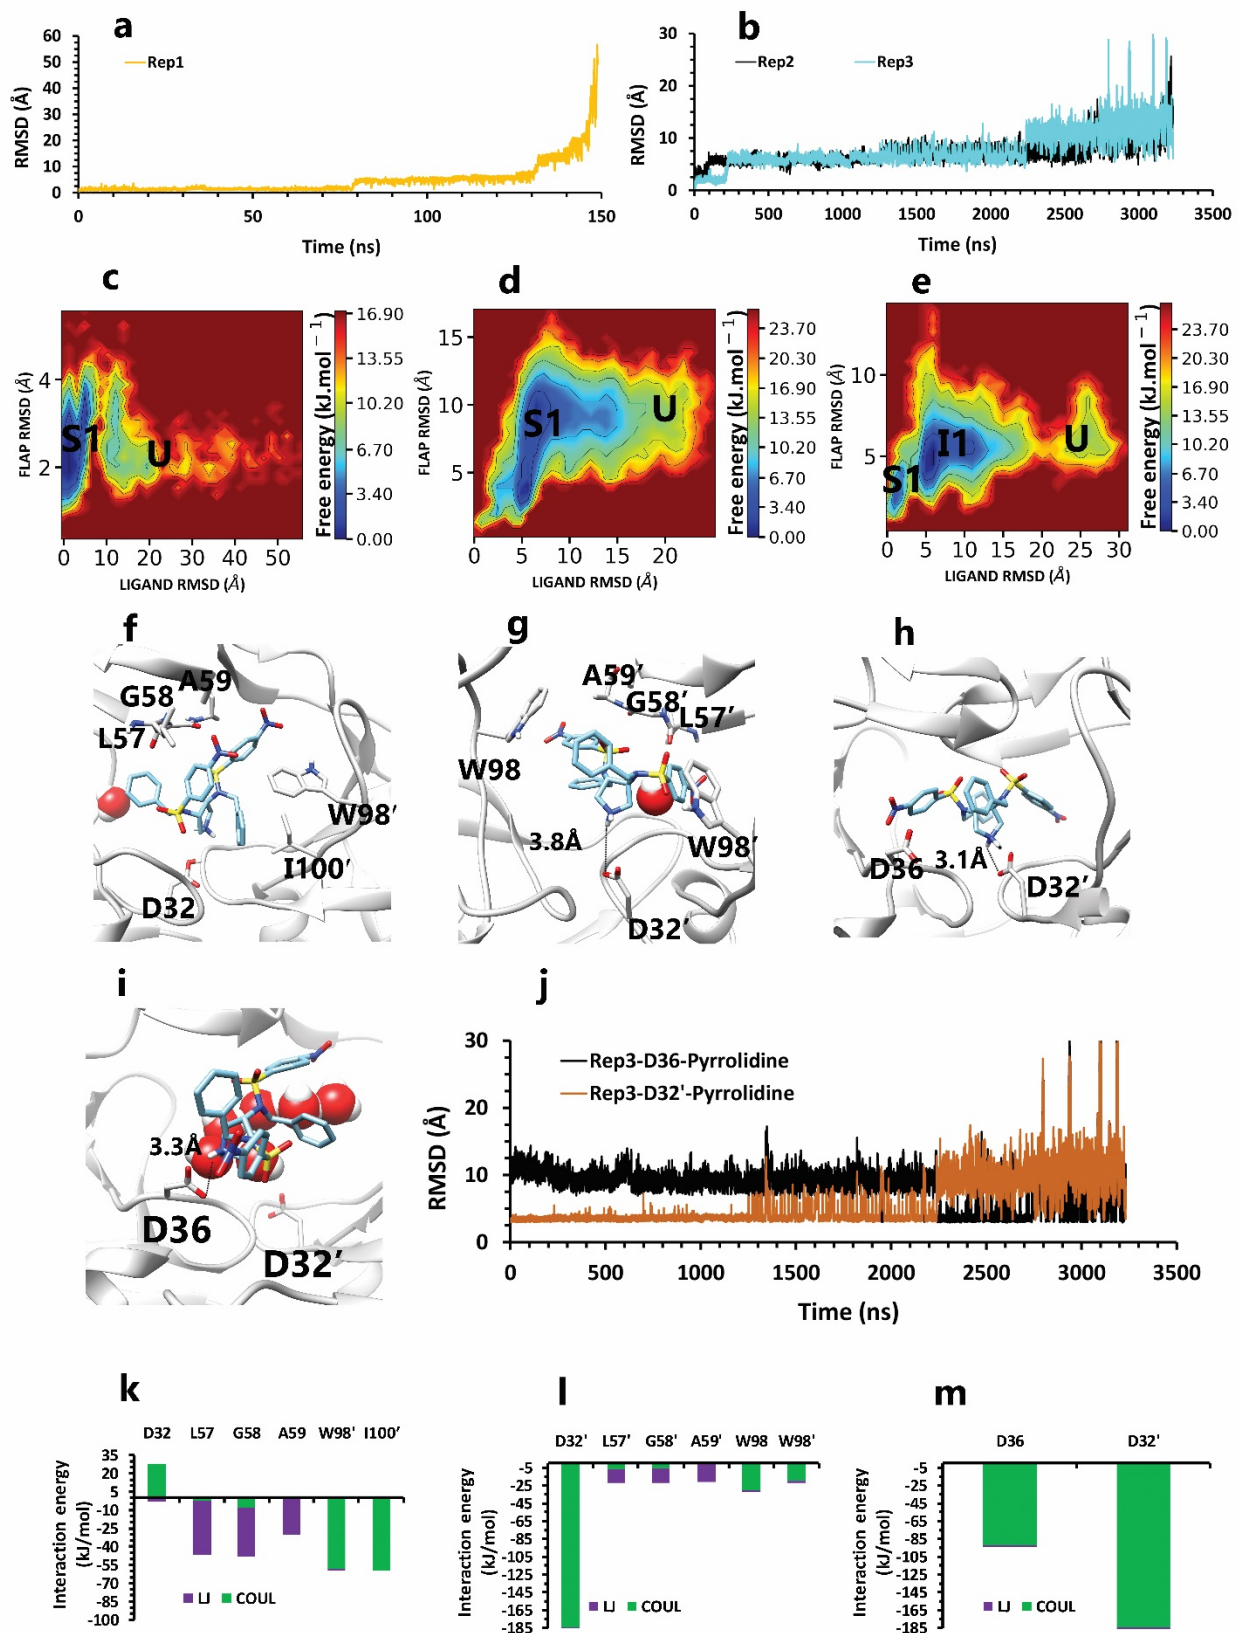

311 **Figure 10.** The details of compound 9 unbinding pathways in complex with HTLV-1 protease when Asp32  
312 of chain A was protonated in three replicas. **a**, RMSD value of the ligand from binding pose to complete  
313 unbinding in the rep1. **b**, RMSD values of the ligand from binding pose to complete unbinding in the rep2  
314 and rep3. **c**, **d** and **e**, The free energy landscape of rep1, 2 and 3 during the unbinding process ( state (S),  
315 intermediate state (I), unbound (U) ) respectively, which was calculated by using "gmx sham". **f**, The  
316 interactions between the ligand and important residues of the active site in the rep1. **g**, The interactions  
317 between the ligand and important residues of the active site in the rep2. **h**, The interactions between the  
318 ligand and important active site residues in the binding pose of rep3. **i**, The new interactions between the  
319 inhibitor and particular residues in the second intermediate state of rep3. **j**, The distance between COMs of  
320 pyrrolidine ring and Asp36 and Asp32' in rep3, to show after 2us of simulation this fragment get closer to  
321 Asp36 and get farther from Asp32'. **k**, **l** and **3**, The average of most important interaction energies of the  
322 protein-ligand complex in rep1, 2 and 3, respectively.

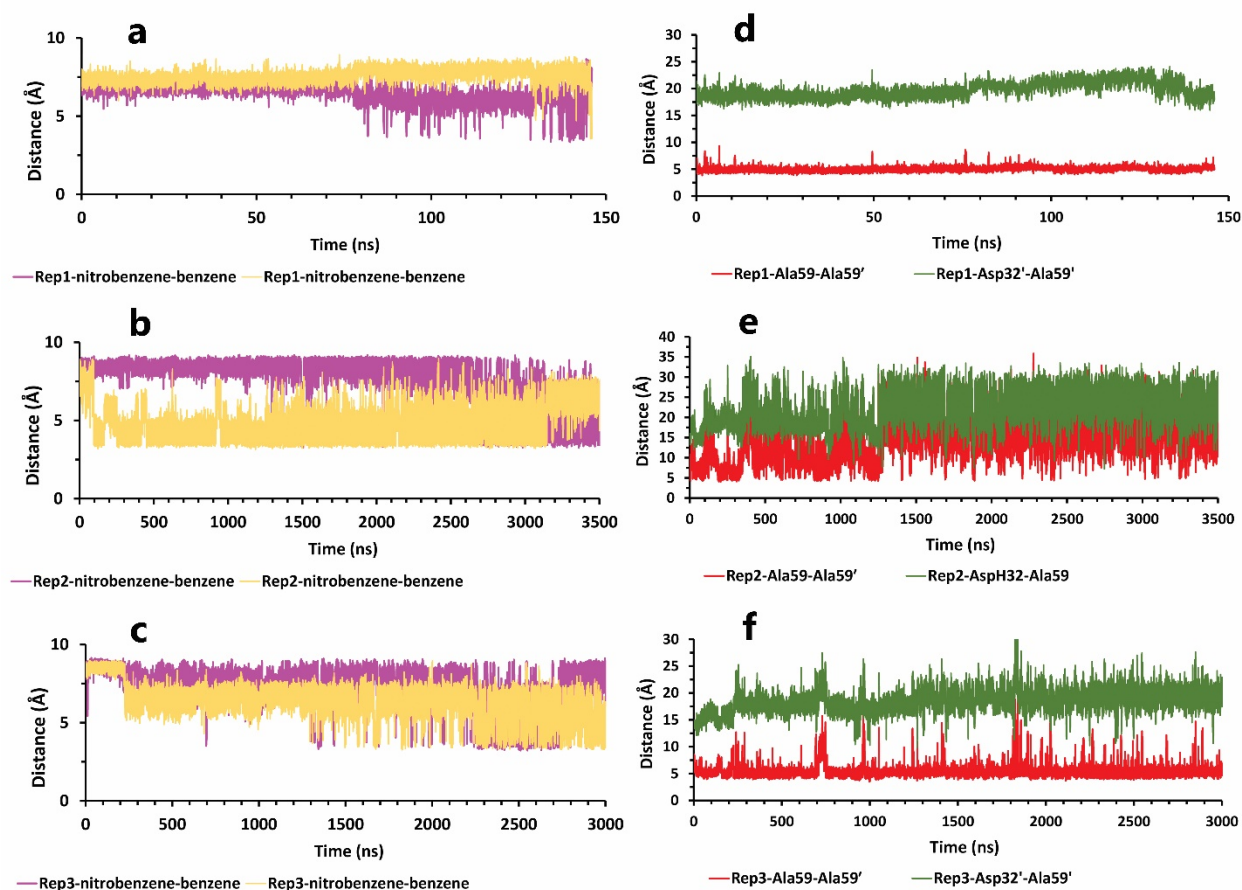

323  
324 **Figure 11.** The details of distances between particular parts in compound 9 in complex with HTLV-1  
325 protease, when Asp32 of chain B was protonated, in three replicas. **a**, **b** and **c**, The distance between COMs

326 of both aniline rings and benzene rings, which were in a position that could form pi-pi self-interactions in  
327 all replicas. These plots prove that during the whole simulation, these fragments were so close together. **d**,  
328 The distance between COMs of Ala59 andAla59' and also Asp32' Ala59' in the rep1 (these plots should be  
329 checked with Figure 3). **e**, The distance between COMs of Ala59 andAla59' and also AspH32 Ala59 in the  
330 rep2. **f**, The distance between COMs of Ala59 andAla59' and also Asp32' Ala59' in the rep3. **g** and **h**, The  
331 total interactions energies of protein-inhibitor complexes in rep1, 2, and 3.



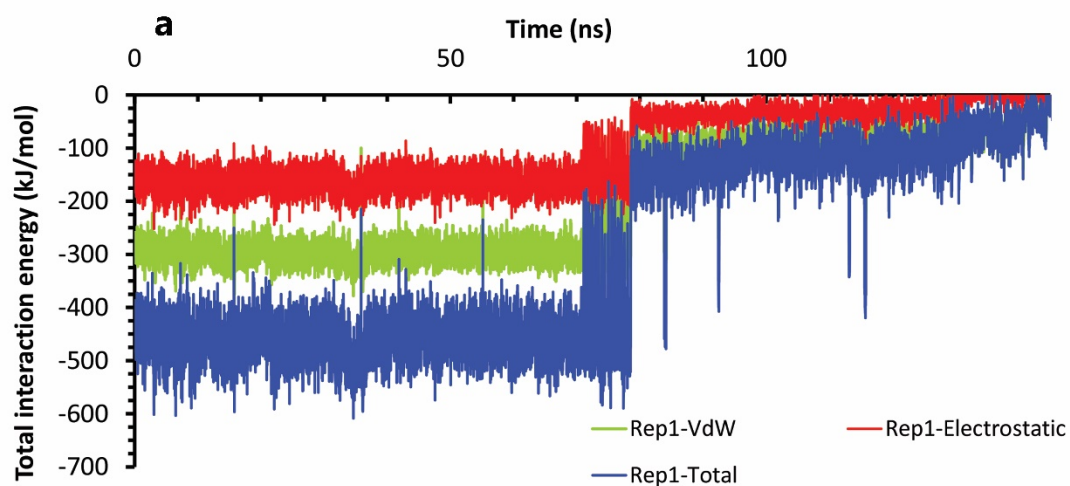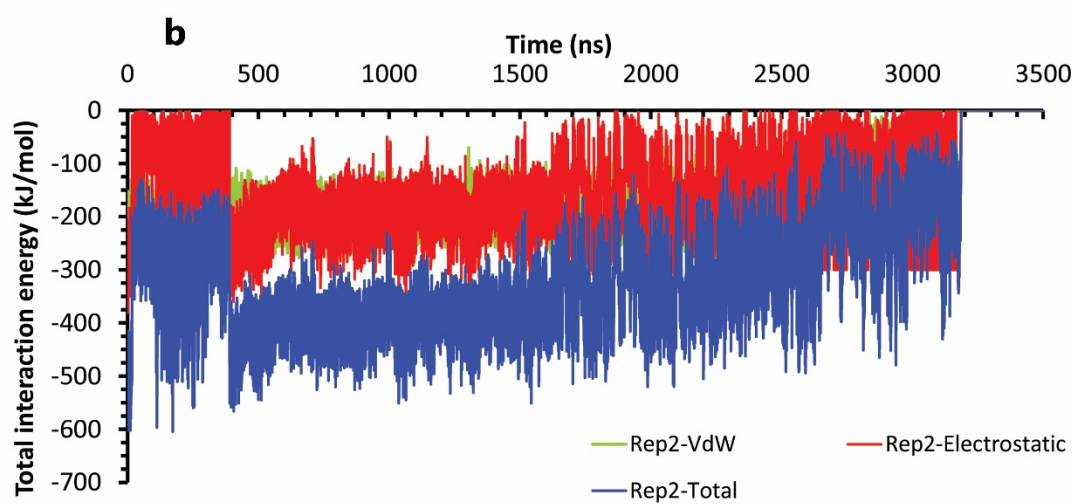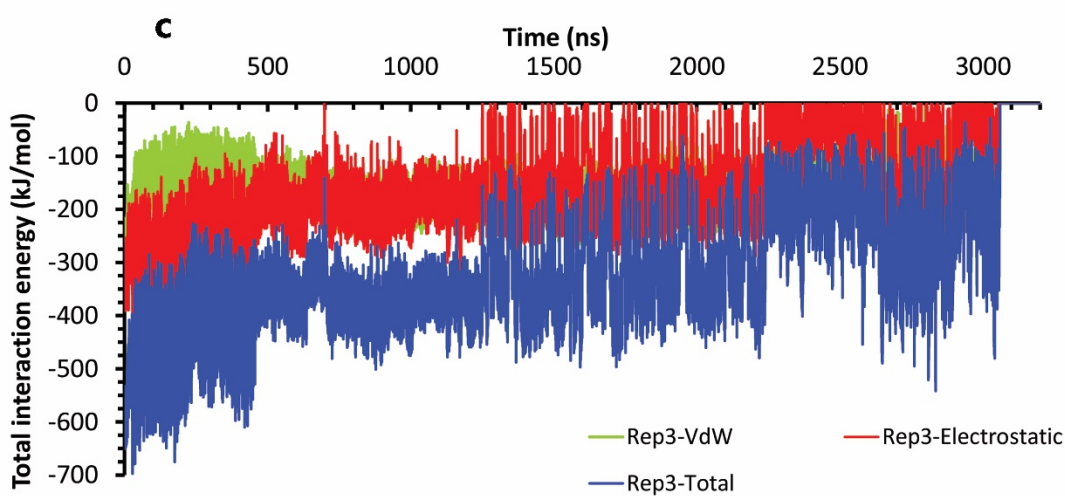

333 **Figure 12.** The interaction energies plots of compound 9 in complex with HTLV-1 protease when Asp32  
334 of chain A was protonated in three replicas. **a, b,** and **c,** The total VdW and electrostatic interactions energies  
335 of protein-inhibitor complexes in rep1, 2, and 3

336 On the contrary, when the Asp32 of chain B was protonated, we saw the same  
337 mechanism during the 1.2  $\mu$ s, 410, and 450 ns of simulations (Figure 13a, 13b). In the first  
338 state of these replicas (Figure 13c, 13d, 13e), the ligand was surrounded by interactions of  
339 some residues in both chains (Figure 13g, 13h, 13i). In more detail, Asp32 had salt bridge  
340 interaction with pyrrolidine fragment as a most important interaction. This fragment also  
341 had VdW interaction with Gly34. For the other fragments, one of the nitrobenzene rings  
342 was in VdW interactions with Leu57' and Gly58' in the flaps regions. The benzene rings  
343 were in important interactions involving: pi-pi interaction with Trp98 and pi-alkyl  
344 interaction with Ile100 in one side, and pi-pi interactions with Trp98' and pi-alkyl  
345 interaction with Ile100' on the other side (Figure 13f). It may be due to the high number of  
346 important factors; it seems that compound 9 is potent, but except Asp32 other agents did  
347 not have any significant effect. So, they could not keep the ligand after disappearing of  
348 Asp32 effect. Thus, as time passed, ligand self-interactions and water mediation  
349 contributed to full unbinding in these three replicas (Figure 14a, 14b, 14c). Ultimately for  
350 the flaps effects, in rep1, the flaps showed high motions, and even though the flaps were  
351 wide open (Figure 14d), the full unbind did not occur from this region. In rep2 and 3, the  
352 inhibitor unbounded between semi-open forms of flaps (Figure 14e, 14f) (Figure 15a, 15b,  
353 15c).

354

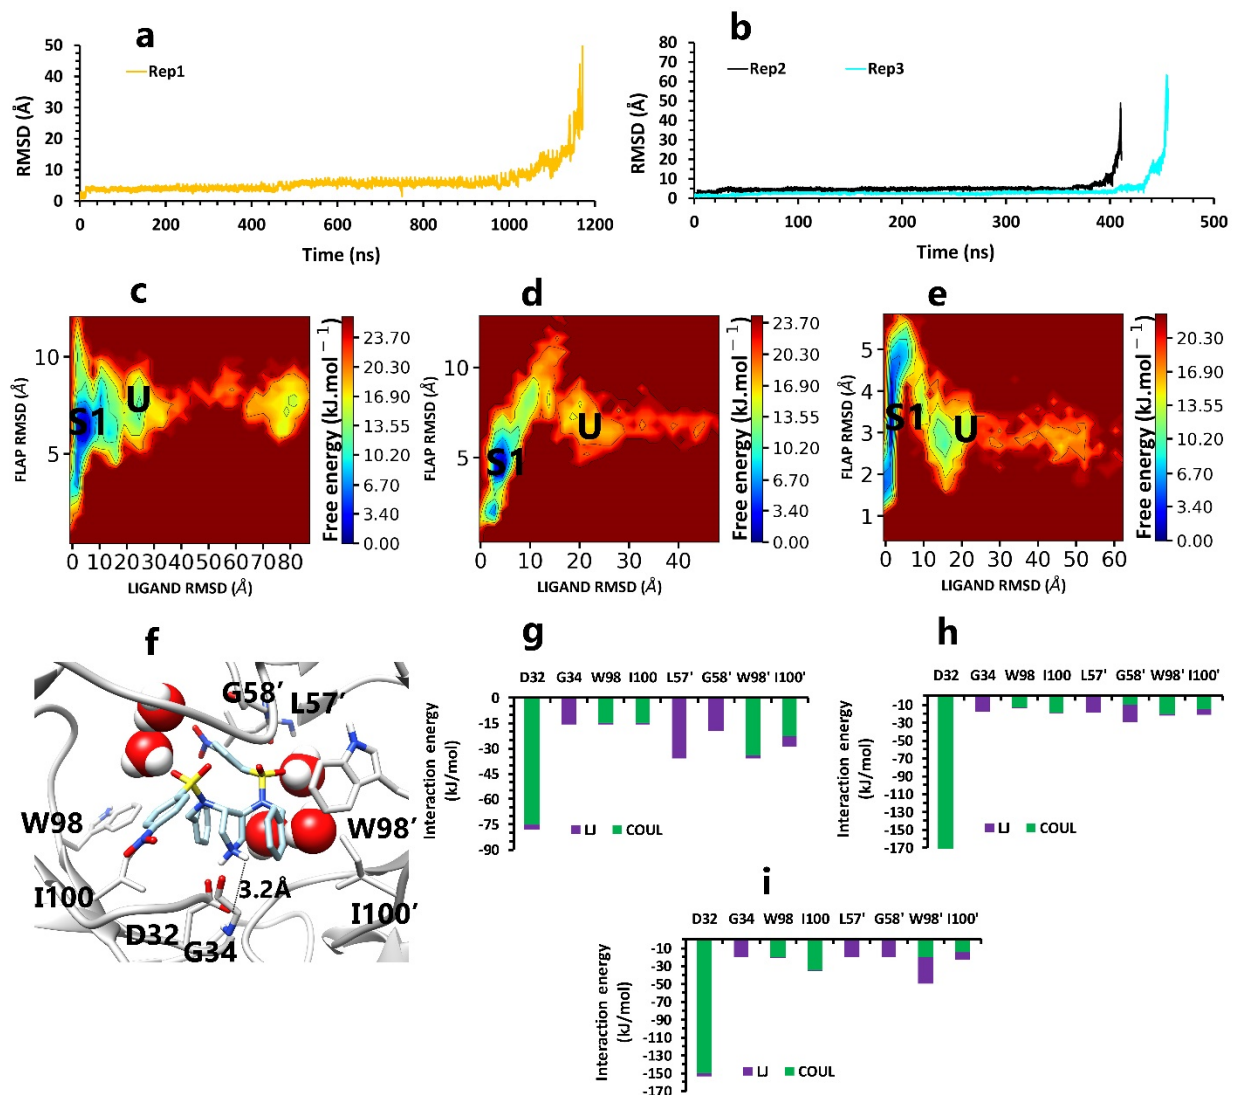

355

356

357 **Figure 13.** The details of compound 9 unbinding pathways in complex with HTLV-1 protease ( state (S),  
 358 intermediate state (I), unbound (U) ) when Asp32 of chain B was protonated, in three replicas. **a**, RMSD  
 359 value of the ligand from binding pose to complete unbinding in the rep1. **b**, RMSD values of the ligand  
 360 from binding pose to complete unbinding in the rep2 and rep3. **c**, **d** and **e**, The free energy landscape of  
 361 rep1, 2, and 3 during the unbinding process, respectively, was calculated using "gmx sham". **f**, The  
 362 interactions between the ligand and important active site residues in the rep1, 2, and 3. **g**, **h**, and **i**, The  
 363 average of most important interaction energies of the protein-ligand complex in rep1, 2, and 3, respectively.

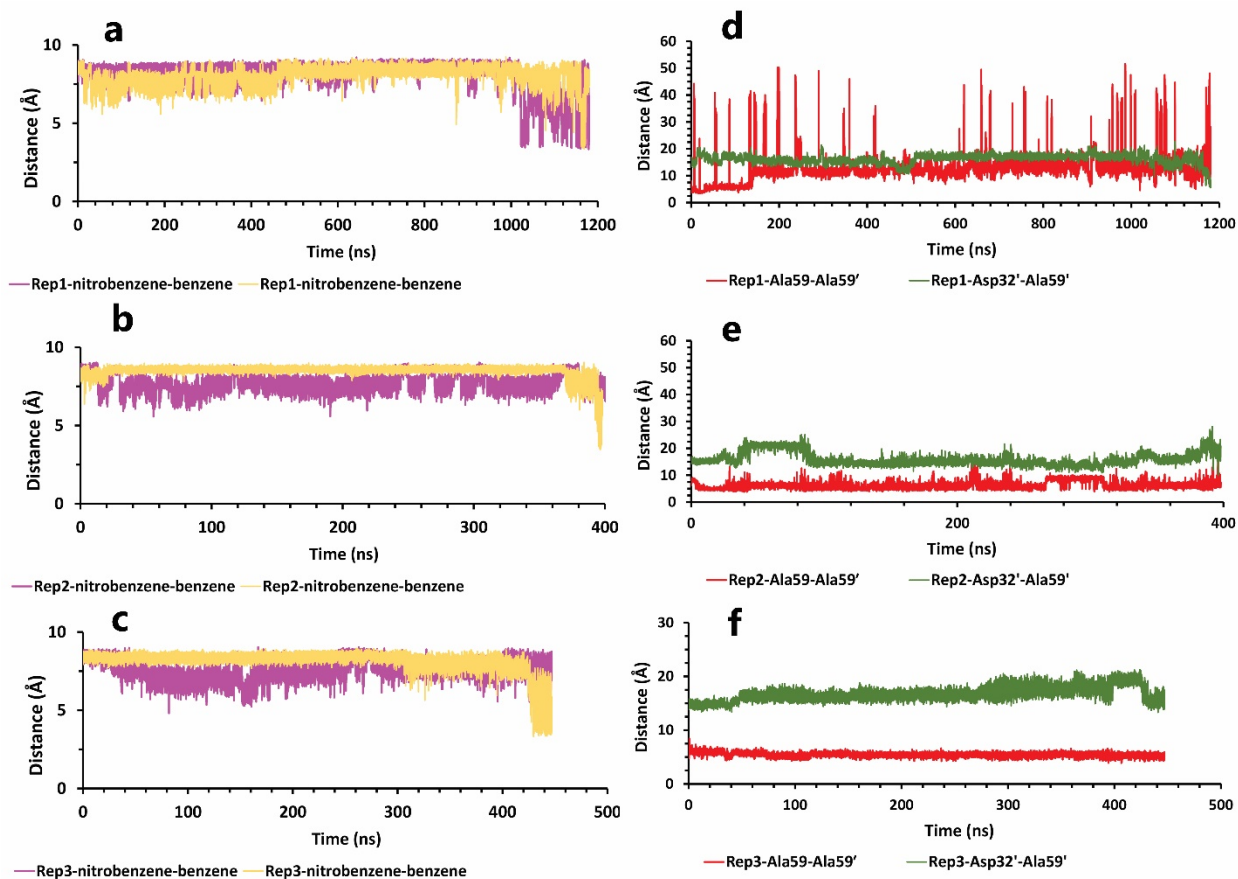

364

365 **Figure 14.** The details of distances between particular parts in compound 9 in complex with HTLV-1  
366 protease when Asp32 of chain B was protonated in three replicas. **a, b** and **c**, The distance between COMs  
367 of both aniline rings and benzene rings, which were in a position that could form pi-pi self-interactions in  
368 all replicas. These plots prove that during the whole simulation, these fragments were so close together. **d,**  
369 **e** and **f**, The distance between COMs of Ala59 and Ala59' and also Asp32' Ala59' in all replicas (these plots  
370 should be checked with Figure 3).

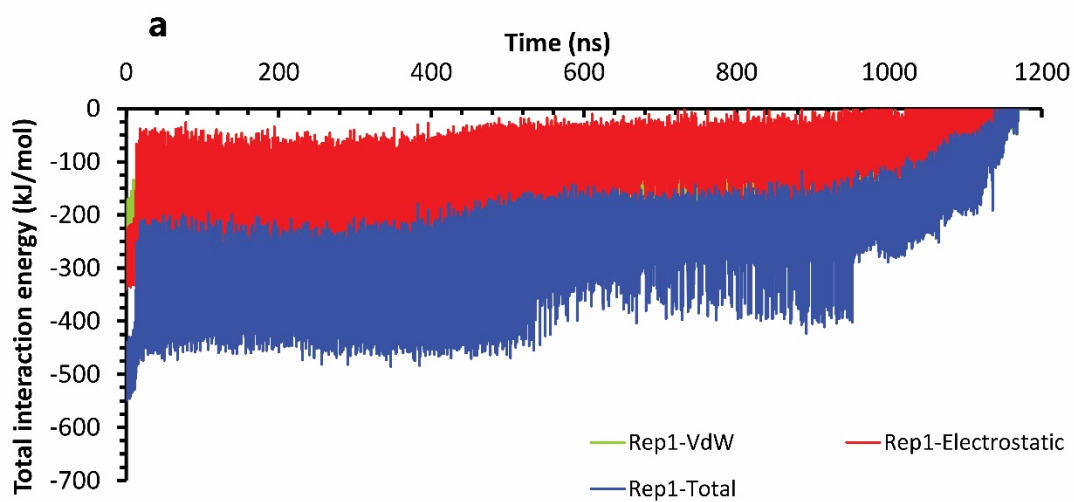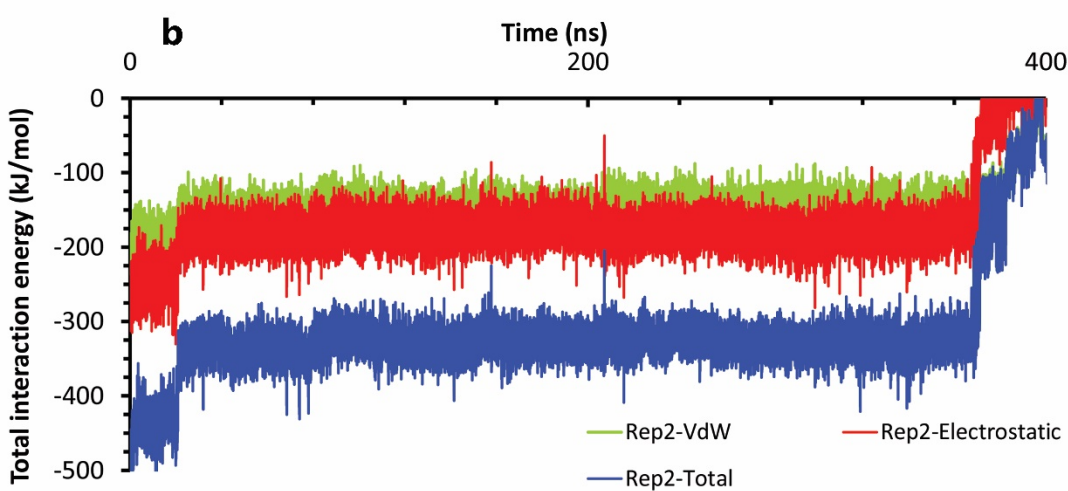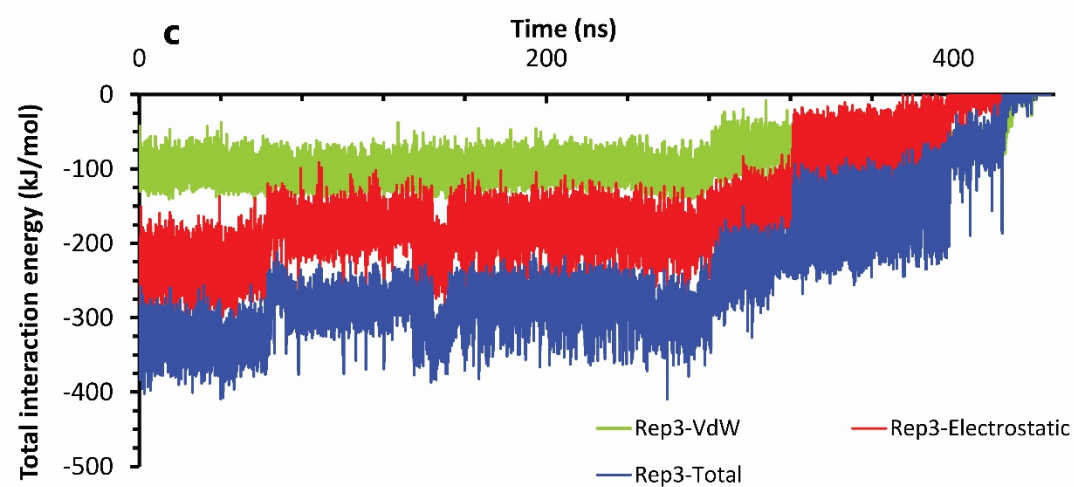

372 **Figure 15.** The interaction energies plots of compound 9 in complex with HTLV-1 protease when Asp32  
373 of chain B was protonated in three replicas. **a, b, and c,** The total VdW and electrostatic interactions energies  
374 of protein-inhibitor complexes in rep1, 2, and 3

375

## 376 **Conclusion**

377 By putting together, the atomistic details of unbinding pathways of selected  
378 inhibitors in all replicas, with various times, the importance of Asp32' in chain A  
379 protonation state and Asp32 in chain B protonation state are pretty straightforward. Due to  
380 its strategic position, this effective residue could play a critical role in keeping the ligand  
381 in the binding pocket for a long time, so the more exposed to Asp32 or Asp32', the more  
382 inhibitory effects. The pyrrolidine fragment was held well by Asp32 or Asp32' from the  
383 native binding pose of the two compounds. Thus, the interactions of other fragments with  
384 other residues in different regions of protein caused significant differences.

385 Herein, we cannot conclude certainly which state of protonation actually  
386 occurs, so with our obtained information for the potent compound in chain A protonation  
387 state, His66' with its cation- $\pi$  interaction with an aniline ring of inhibitor was a perfect  
388 supporter to Asp32'. This residue's effect was absent in the other form of protonation state  
389 and caused a significant difference in simulation time. In the weak inhibitor unbinding  
390 pathways, Trp98 and Trp98' with  $\pi$ - $\pi$  interactions, due to their close position to one of  
391 the exit areas were not good supporters for Asp32 or Asp32', like His66', His66', due to its  
392 far position from the bottom and center of the binding pocket, could fixed aniline fragment  
393 and decreased ligand fluctuations. The two mentioned tryptophan were closer to the  
394 important aspartic acids, and there was enough space for ligand fluctuations. For this  
395 reason, Asp36 in the active site that was close to the exit area could be a competitor with  
396 Asp32' and was not a good interaction for keeping the ligand in the binding pocket.  
397 Similarly, attenuating effect of Trp98/Trp98' residues in unbinding pathways of the weak  
398 inhibitor has a correlation with another research result. These residues' interactions are  
399 unfavorable to Indinavar's stability in complex with HTLV-1 protease and result in it being

400 a weak inhibitor. [31]As we said before, both compounds had self-interactions that caused  
401 weakening critical protein-ligand interactions by time passing. These two compounds did  
402 not have the same self-interaction type, so in the weak inhibitor, face-to-face pi-pi  
403 interactions caused to loosed important pi interactions with the protein, but the potent  
404 inhibitor could have formed more important pi interactions with the protein along with self-  
405 interactions. Overall, this obtained information is valuable for designing a new generation  
406 of inhibitors against this molecular target.

407

### 408 **Data and Software Availability**

409 All data and analysis files are uploaded to this address  
410 (<https://zenodo.org/record/5633143#.YZXlftBBzIU>) and are available with  
411 DIO:10.5281/zenodo.5633143. Also, in the method section, all used software is listed.

412

### 413 **Table of Contents graphic**

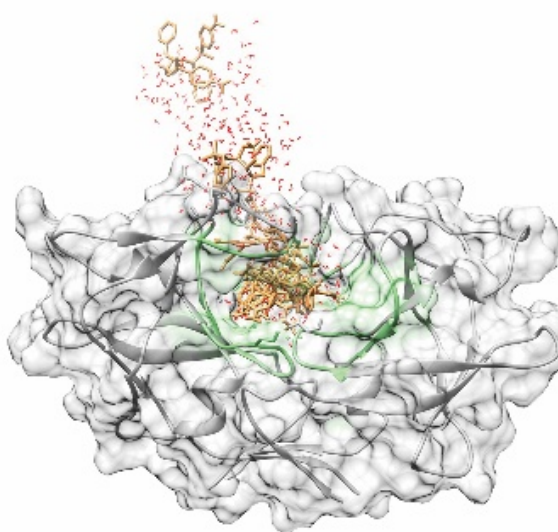

**Unbinding pathway of compound 9**

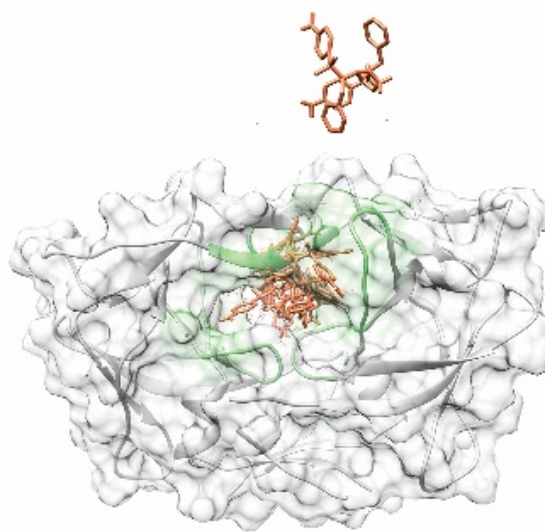

**Unbinding pathway of compound 10**

414

415

### 416 **References**

- 417 1. A. Vahlne, “A historical reflection on the discovery of human retroviruses,”  
418 *Retrovirology*, vol. 6, pp. 1–9, 2009.
- 419 2. M. E. Haziot *et al.*, “Detection of clinical and neurological signs in apparently  
420 asymptomatic HTLV-1 infected carriers: Association with high proviral load,” *PLoS*  
421 *Negl. Trop. Dis.*, vol. 13, no. 5, pp. 1–9, 2019.
- 422 3. K. Kamoi, “HTLV-1 in Ophthalmology,” *Front. Microbiol.*, vol. 11, no. March, pp. 1–  
423 12, 2020.
- 424 4. Y. Tagaya, M. Matsuoka, and R. Gallo, “40 years of the human T-cell leukemia virus:  
425 past, present, and future,” *F1000Research*, vol. 8, p. 228, 2019.
- 426 5. R. F. Edlich, J. A. Arnette, and F. M. Williams, “Global epidemic of human T-cell  
427 lymphotropic virus type-I (HTLV-I),” *J. Emerg. Med.*, vol. 18, no. 1, pp. 109–119,  
428 2000.
- 429 6. M. Hatanaka and S. H. Nam, “Identification of HTLV-I gag protease and its sequential  
430 processing of the gag gene product,” *J. Cell. Biochem.*, vol. 40, no. 1, pp. 15–30,  
431 1989.
- 432 7. S. B. Shuker, V. L. Mariani, B. E. Herger, and K. J. Dennison, “Pii: S1074-  
433 5521(03)00002-4,” vol. 10, pp. 1–9, 2003.
- 434 8. J. T. Nguyen *et al.*, “Truncation and non-natural amino acid substitution studies on  
435 HTLV-I protease hexapeptidic inhibitors,” *Bioorganic Med. Chem. Lett.*, vol. 18, no.  
436 1, pp. 366–370, 2008.
- 437 9. T. Satoh, M. Li, J. T. Nguyen, Y. Kiso, A. Gustchina, and A. Wlodawer, “Crystal  
438 structures of inhibitor complexes of human T-Cell leukemia virus (HTLV-1)  
439 protease,” *J. Mol. Biol.*, vol. 401, no. 4, pp. 626–641, 2010.
- 440 10. M. Kuhnert, H. Steuber, and W. E. Diederich, “Structural basis for HTLV-1 protease  
441 inhibition by the HIV-1 protease inhibitor indinavir,” *J. Med. Chem.*, vol. 57, no. 14,  
442 pp. 6266–6272, 2014.



- 443 11. M. Kuhnert, A. Blum, H. Steuber, and W. E. Diederich, “Privileged Structures Meet  
444 Human T-Cell Leukemia Virus-1 (HTLV-1): C<sub>2</sub>-Symmetric 3,4-Disubstituted  
445 Pyrrolidines as Nonpeptidic HTLV-1 Protease Inhibitors,” *J. Med. Chem.*, vol. 58,  
446 no. 11, pp. 4845–4850, 2015.
- 447 12. Y. Niu, S. Li, D. Pan, H. Liu, and X. Yao, “Computational study on the unbinding  
448 pathways of B-RAF inhibitors and its implication for the difference of residence  
449 time: Insight from random acceleration and steered molecular dynamics  
450 simulations,” *Phys. Chem. Chem. Phys.*, vol. 18, no. 7, pp. 5622–5629, 2016.
- 451 13. J. Rydzewski and O. Valsson, “Finding multiple reaction pathways of ligand  
452 unbinding,” *J. Chem. Phys.*, vol. 150, no. 22, 2019.
- 453 14. P. Tiwary, V. Limongelli, M. Salvalaglio, and M. Parrinello, “Kinetics of protein-  
454 ligand unbinding: Predicting pathways, rates, and rate-limiting steps,” *Proc. Natl.  
455 Acad. Sci. U. S. A.*, vol. 112, no. 5, pp. E386–E391, 2015.
- 456 15. A. Barducci, M. Bonomi, and M. Parrinello, “Metadynamics,” *Wiley Interdiscip. Rev.  
457 Comput. Mol. Sci.*, vol. 1, no. 5, pp. 826–843, 2011.
- 458 16. P. Tiwary, J. Mondal, and B. J. Berne, “How and when does an anticancer drug leave  
459 its binding site?,” *Sci. Adv.*, vol. 3, no. 5, 2017.
- 460 17. D. Sabbadin, V. Salmaso, M. Sturlese, and S. Moro, “Supervised molecular dynamics  
461 (SuMD) approaches in drug design,” *Methods Mol. Biol.*, vol. 1824, no. Md, pp.  
462 287–298, 2018.
- 463 18. F. T. J. C. C. 2004 UCSF Chimera--a visualization system for exploratory research and  
464 analysis. Pettersen EF, Goddard TD, Huang CC, Couch GS, Greenblatt DM, Meng  
465 EC, “UCSF Chimera.”
- 466 19. A. W. Sousa Da Silva and W. F. Vranken, “ACPYPE - AnteChamber PYthon Parser  
467 interface,” *BMC Res. Notes*, vol. 5, pp. 1–8, 2012.
- 468 20. F. Hofer, J. Kraml, U. Kahler, A. S. Kamenik, and K. R. Liedl, “Catalytic Site p

- 469 KaValues of Aspartic, Cysteine, and Serine Proteases: Constant pH MD  
470 Simulations,” *J. Chem. Inf. Model.*, vol. 60, no. 6, pp. 3030–3042, 2020.
- 471 21. M. J. Abraham *et al.*, “Gromacs: High performance molecular simulations through  
472 multi-level parallelism from laptops to supercomputers,” *SoftwareX*, vol. 1–2, pp.  
473 19–25, 2015.
- 474 22. E. Monvall, “Statsbudgeten: de stora reformerna gäller arbetslivet,” *Tidskr. Sver.*  
475 *Sjukskot.*, vol. 43, no. 2, pp. 54–58, 1976.
- 476 23. W. L. Jorgensen, J. Chandrasekhar, J. D. Madura, R. W. Impey, and M. L. Klein,  
477 “Comparison of simple potential functions for simulating liquid water,” *J. Chem.*  
478 *Phys.*, vol. 79, no. 2, pp. 926–935, 1983.
- 479 24. B. Hess, H. Bekker, H. J. C. Berendsen, and J. G. E. M. Fraaije, “LINCS: A Linear  
480 Constraint Solver for molecular simulations,” *J. Comput. Chem.*, vol. 18, no. 12, pp.  
481 1463–1472, 1997.
- 482 25. T. Darden, D. York, and L. Pedersen, “Particle mesh Ewald: An  $N \cdot \log(N)$  method for  
483 Ewald sums in large systems,” *J. Chem. Phys.*, vol. 98, no. 12, pp. 10089–10092,  
484 1993.
- 485 26. G. Bussi, D. Donadio, and M. Parrinello, “Canonical sampling through velocity  
486 rescaling,” *J. Chem. Phys.*, vol. 126, no. 1, 2007.
- 487 27. M. Parrinello and A. Rahman, “Polymorphic transitions in single crystals: A new  
488 molecular dynamics method,” *J. Appl. Phys.*, vol. 52, no. 12, pp. 7182–7190, 1981.
- 489 28. D. Sabbadin and S. Moro, “Supervised molecular dynamics (SuMD) as a helpful tool  
490 to depict GPCR-ligand recognition pathway in a nanosecond time scale,” *J. Chem.*  
491 *Inf. Model.*, vol. 54, no. 2, pp. 372–376, 2014.
- 492 29. 25-28. Kraus, D. (2014) Consolidated data analysis and presentation using an open-  
493 source add-in for the Microsoft Excel® spreadsheet software. Medical Writing, 23,  
494 “Daniel’s XL Toolbox.”

495 30. 2007. J. D. Hunter, “Matplotlib: A 2D Graphics Environment”, Computing in Science  
496 & Engineering, vol. 9, no. 3, pp. 90-95, “Matplotlib.”

497 31. F. Sohraby and H. Aryapour, “Comparative analysis of the unbinding pathways of  
498 antiviral drug Indinavir from HIV and HTLV1 proteases by supervised molecular  
499 dynamics simulation,” *PLoS One*, vol. 16, no. 9, p. e0257916, 2021.

500
